# Supplementary material for: Prevalence and Genetic Diversity of Cross-Assembly Phages in Wastewater Treatment Plants in Riyadh, Saudi Arabia
Source: MDPI journal article supplement (doi:10.3390/microorganisms11092167), 2023-08-27
Supplement: s1 [file s1]

TGACCGTGATACTCAAGATG

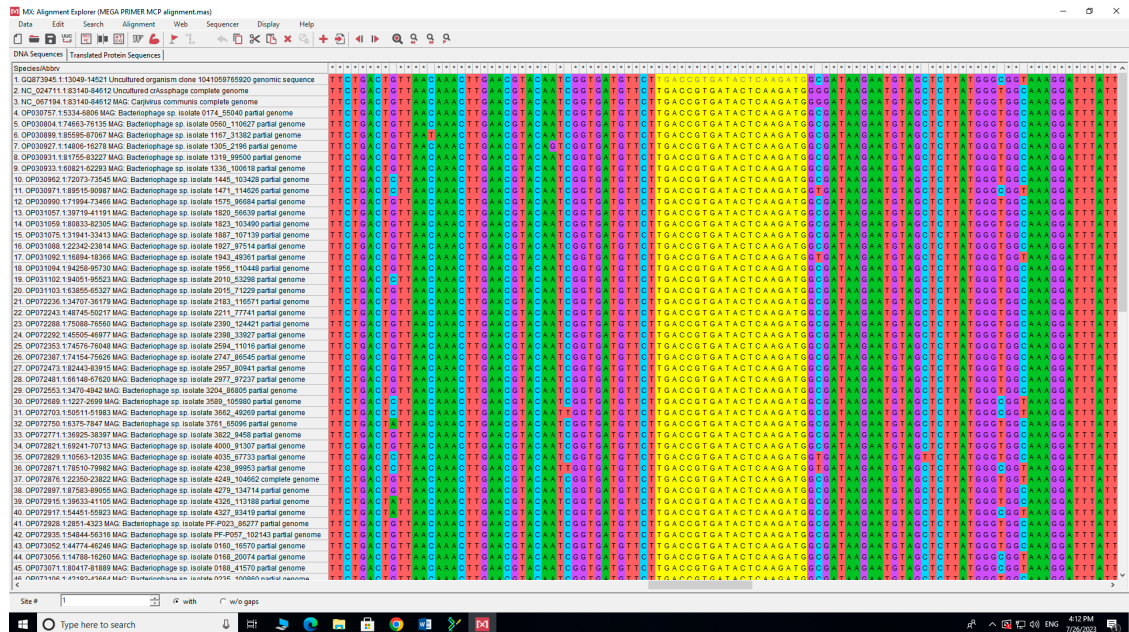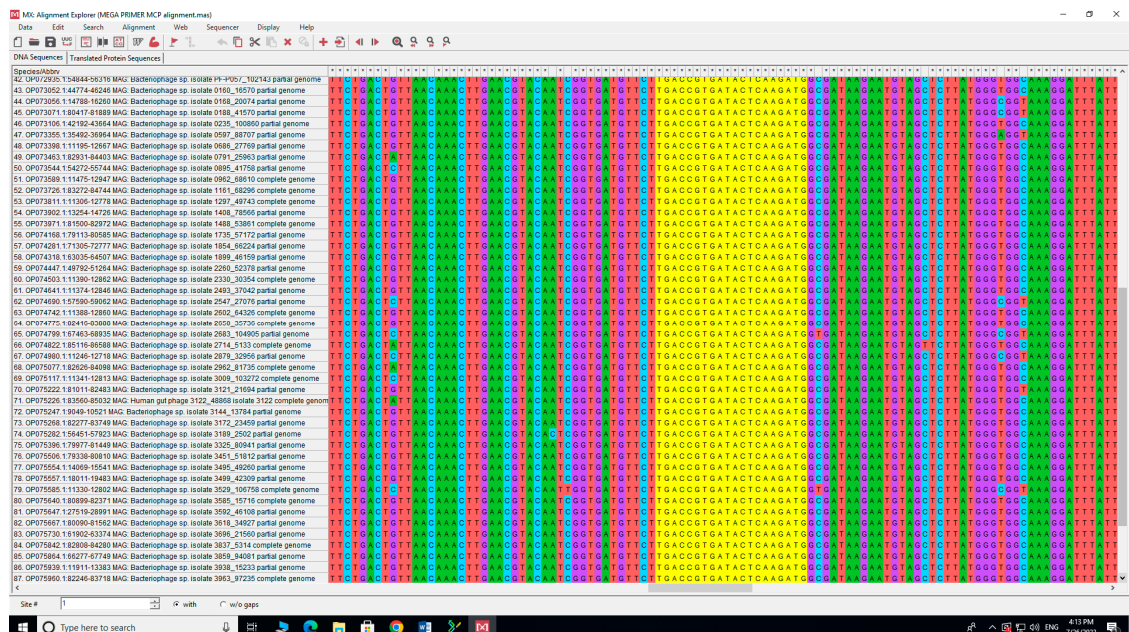



MCP

Reverse primer

GACGTACTATACGAACATTCTG

(Reverse complementary)

CAGAATGTTTCGTATAGTACGTC

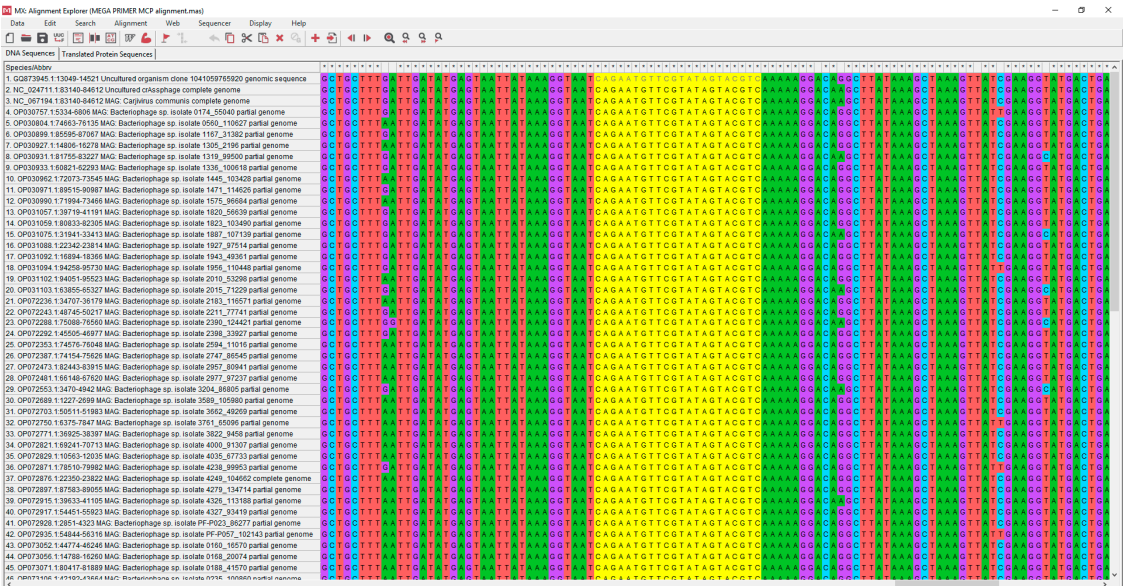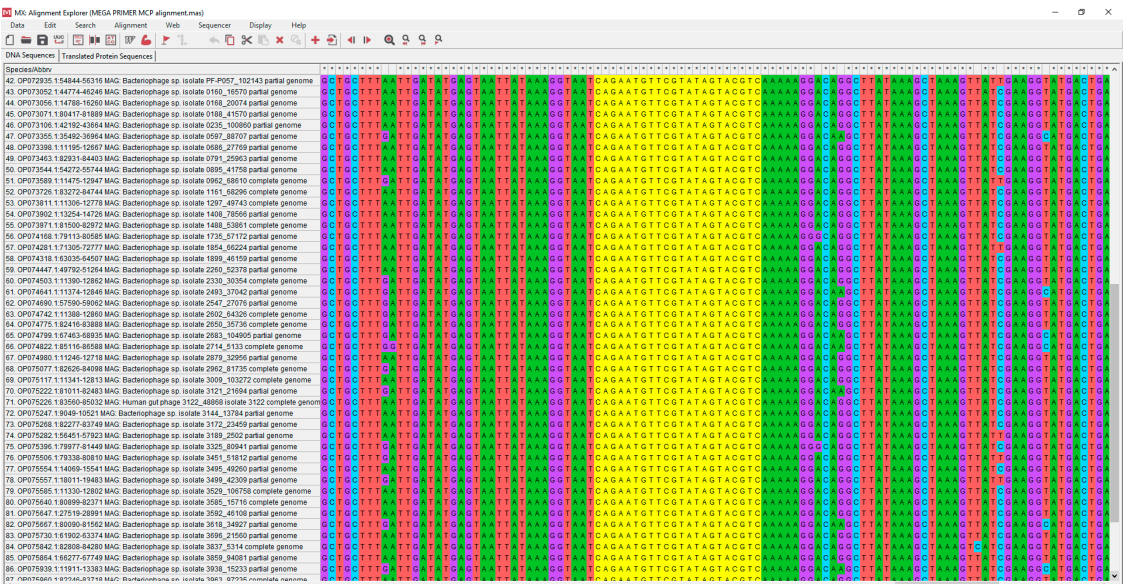

The image displays the MEGA PRIMER-MCL alignment tool interface. The top menu bar includes File, Edit, Search, Alignment, View, Sequencer, Display, and Help. Below the menu is a toolbar with icons for file operations (open, save, print), search (find, replace), alignment (align, unalign), and visualization (zoom, pan). The main window shows a list of DNA sequences on the left, each with an accession number and a species name. The sequences are aligned in a grid format, with each row representing a sequence and each column representing a position in the alignment. The sequences are color-coded: green for 'A', red for 'T', blue for 'C', and yellow for 'G'. The alignment is shown as a series of colored blocks, indicating regions of high similarity. The sequences are listed in ascending order of their accession numbers, starting from L. PVF02068 at the top and ending with L. PVF02448 at the bottom. The alignment is displayed in a grid format, with each row representing a sequence and each column representing a position in the alignment. The sequences are color-coded: green for 'A', red for 'T', blue for 'C', and yellow for 'G'. The alignment is shown as a series of colored blocks, indicating regions of high similarity.



# MP-PBD

## Forward primer

CCTGTTACYGATTCTACTGC

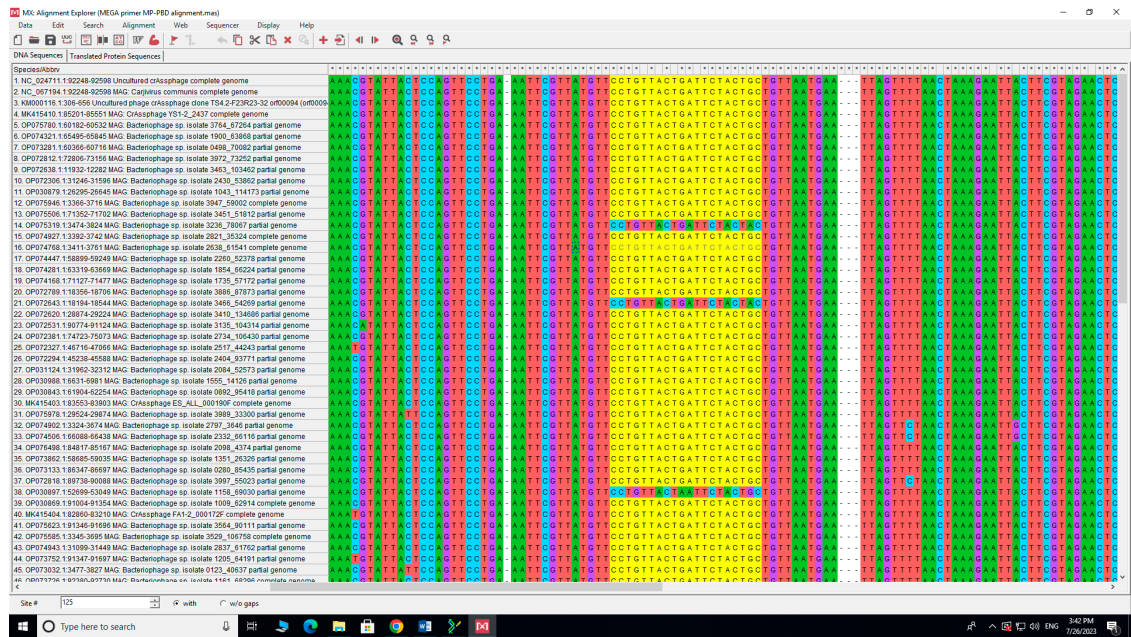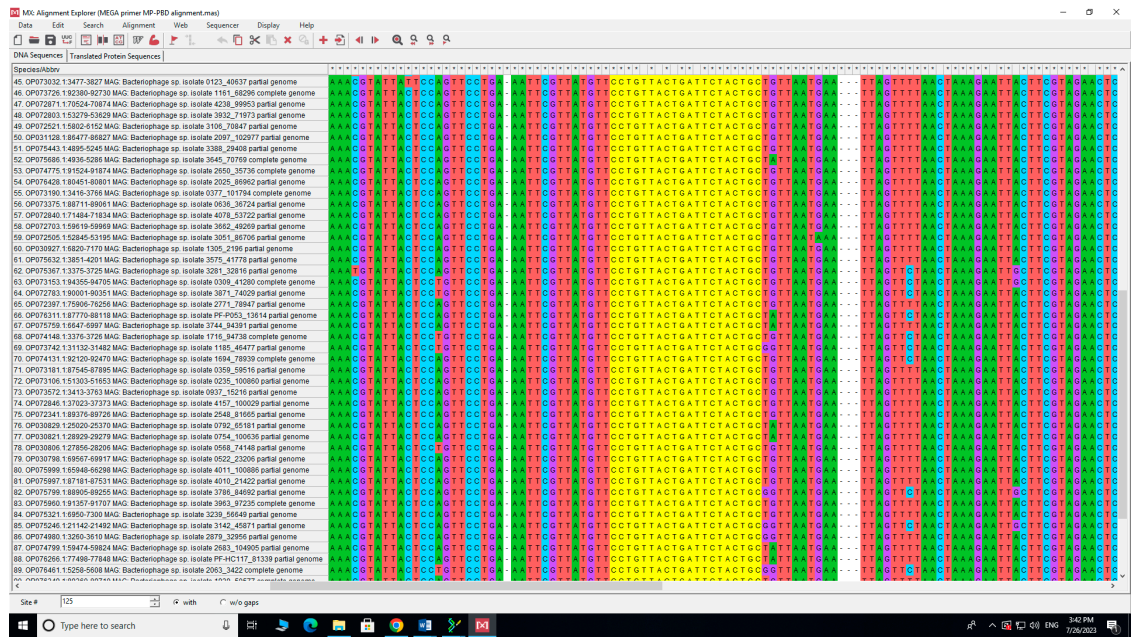

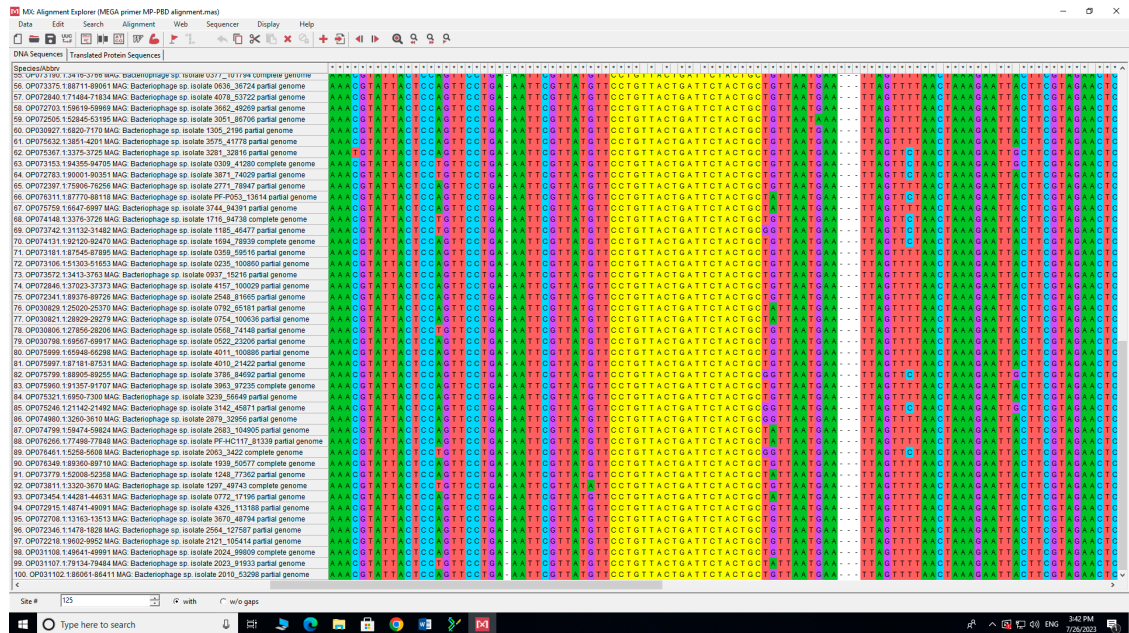

MP-PBD

Reverse primer

ATTCWTRAAGAGTTCTACGAATCC

(Reverse complementary)

GGATTCGTAGAACTCTTRAWGAAT

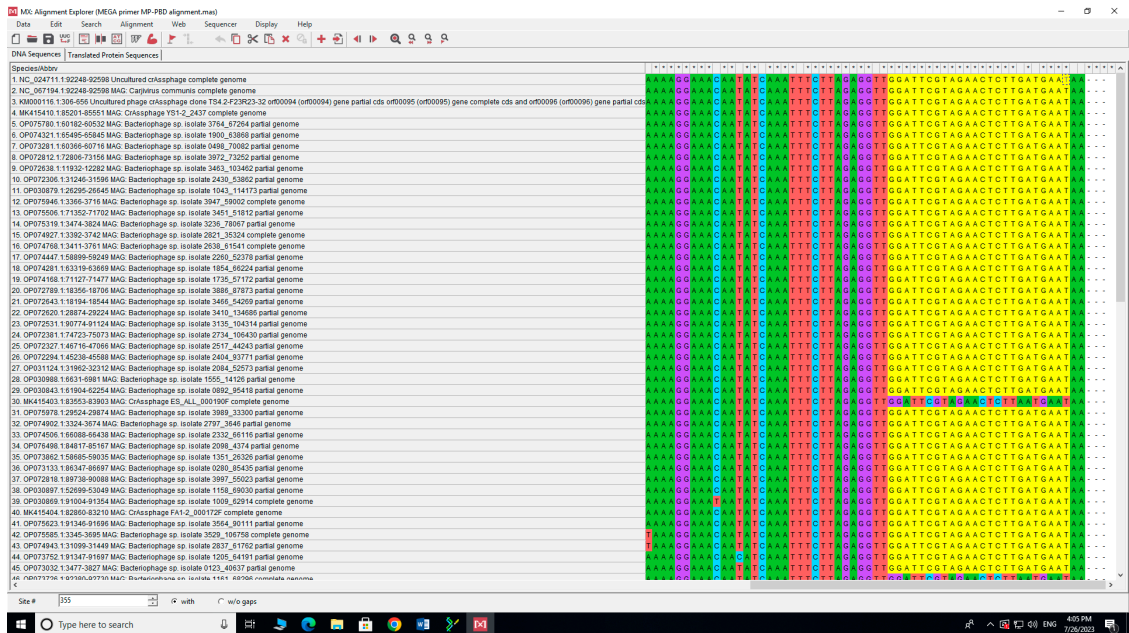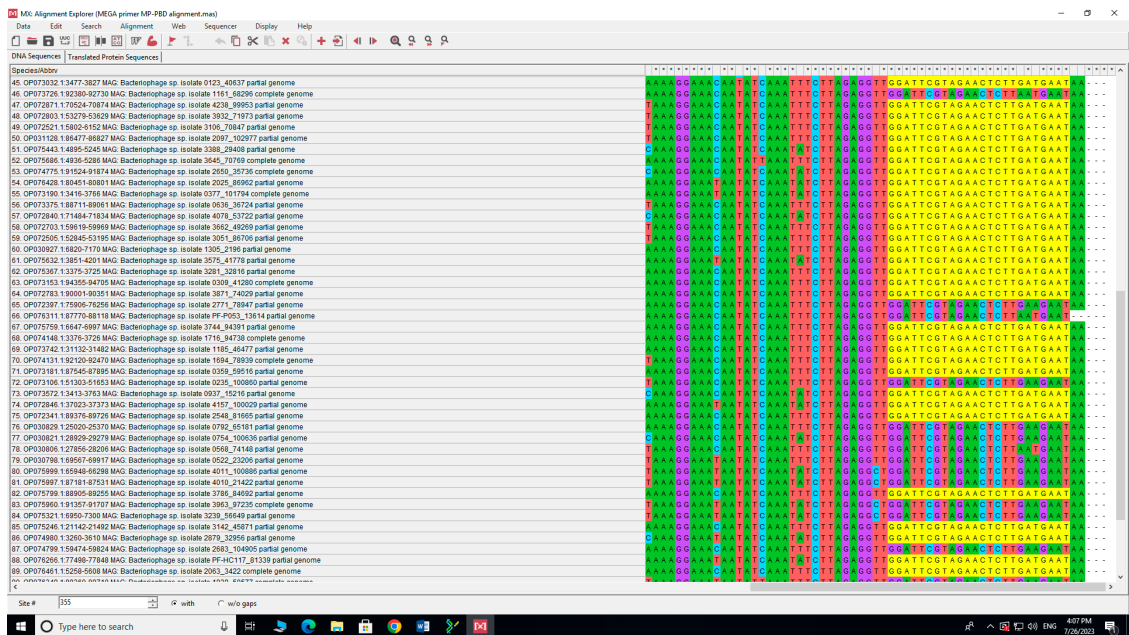

MEGA Alignment Explorer (MEGA primer MP-PBD alignment.maf)

Species/Isolates

55. OP073105 1.3410-3190 MAG. Bacteriophage sp. isolate 0337\_101194 complete genome

56. OP073375 1.88711-89051 MAG. Bacteriophage sp. isolate 0638\_36724 partial genome

57. OP072840 1.74484-74834 MAG. Bacteriophage sp. isolate 4078\_53722 partial genome

58. OP072703 1.59819-59995 MAG. Bacteriophage sp. isolate 3642\_46209 partial genome

59. OP072595 1.52845-53195 MAG. Bacteriophage sp. isolate 3051\_86706 partial genome

60. OP039827 1.6820-7170 MAG. Bacteriophage sp. isolate 1305\_2195 partial genome

61. OP076832 1.3861-4201 MAG. Bacteriophage sp. isolate 2075\_41778 partial genome

62. OP075367 1.3375-3721 MAG. Bacteriophage sp. isolate 3281\_32916 partial genome

63. OP073153 1.94355-94705 MAG. Bacteriophage sp. isolate 0309\_41280 complete genome

64. OP072783 1.90001-90351 MAG. Bacteriophage sp. isolate 3871\_74029 partial genome

65. OP072397 1.75505-75256 MAG. Bacteriophage sp. isolate 2771\_73847 partial genome

66. OP076311 1.87770-88118 MAG. Bacteriophage sp. isolate PF-P053\_13614 partial genome

67. OP075759 1.6647-6987 MAG. Bacteriophage sp. isolate 3744\_94381 partial genome

68. OP074148 1.3375-3721 MAG. Bacteriophage sp. isolate 1716\_34738 complete genome

69. OP073742 1.31132-31482 MAG. Bacteriophage sp. isolate 1185\_46477 partial genome

70. OP074131 1.92120-92470 MAG. Bacteriophage sp. isolate 1684\_78939 complete genome

71. OP073181 1.67545-67895 MAG. Bacteriophage sp. isolate 0359\_59619 partial genome

72. OP073105 1.51303-51653 MAG. Bacteriophage sp. isolate 0235\_10080 partial genome

73. OP073572 1.3413-3763 MAG. Bacteriophage sp. isolate 0937\_15216 partial genome

74. OP073846 1.37623-37373 MAG. Bacteriophage sp. isolate +157\_100029 partial genome

75. OP072341 1.89376-89726 MAG. Bacteriophage sp. isolate 2548\_31665 partial genome

76. OP030829 1.25020-25370 MAG. Bacteriophage sp. isolate 0792\_45181 partial genome

77. OP030621 1.28929-29279 MAG. Bacteriophage sp. isolate 0754\_100536 partial genome

78. OP030806 1.27355-26206 MAG. Bacteriophage sp. isolate 0508\_71461 partial genome

79. OP030798 1.69567-69917 MAG. Bacteriophage sp. isolate 0522\_23200 partial genome

80. OP075999 1.65948-66298 MAG. Bacteriophage sp. isolate 4011\_100885 partial genome

81. OP075987 1.87181-87513 MAG. Bacteriophage sp. isolate 4410\_71422 partial genome

82. OP075799 1.88905-89255 MAG. Bacteriophage sp. isolate 3785\_84692 partial genome

83. OP075960 1.91357-91707 MAG. Bacteriophage sp. isolate 3963\_87235 complete genome

84. OP075321 1.6950-7300 MAG. Bacteriophage sp. isolate 3239\_55649 partial genome

85. OP075245 1.21142-21482 MAG. Bacteriophage sp. isolate 3142\_45871 partial genome

86. OP074880 1.3205-3610 MAG. Bacteriophage sp. isolate 2878\_32958 partial genome

87. OP074799 1.59474-59624 MAG. Bacteriophage sp. isolate 2693\_104805 partial genome

88. OP076296 1.77498-77848 MAG. Bacteriophage sp. isolate PF-HC117\_31133 partial genome

89. OP076461 1.5258-5608 MAG. Bacteriophage sp. isolate 2063\_3422 complete genome

90. OP076349 1.69360-69710 MAG. Bacteriophage sp. isolate 1939\_50577 complete genome

91. OP073778 1.50008-50256 MAG. Bacteriophage sp. isolate 1248\_77261 partial genome

92. OP073811 1.3320-3670 MAG. Bacteriophage sp. isolate 1297\_49743 complete genome

93. OP073454 1.44281-44631 MAG. Bacteriophage sp. isolate 0772\_17195 partial genome

94. OP073151 1.48741-48971 MAG. Bacteriophage sp. isolate 4326\_113105 partial genome

95. OP072708 1.13153-13513 MAG. Bacteriophage sp. isolate 3870\_48794 partial genome

96. OP072346 1.1476-1828 MAG. Bacteriophage sp. isolate 2564\_12787 partial genome

97. OP072218 1.9902-9952 MAG. Bacteriophage sp. isolate 2121\_105414 partial genome

98. OP073108 1.49841-49991 MAG. Bacteriophage sp. isolate 2023\_98908 complete genome

99. OP031107 1.79134-79484 MAG. Bacteriophage sp. isolate 2023\_91933 partial genome

100. OP031102 1.895091-89411 MAG. Bacteriophage sp. isolate 2010\_53299 partial genome

Site # 355

Type here to search

4:07 PM 7/26/2023
