# Supplementary material for: Prevalence and Genetic Diversity of Cross-Assembly Phages in Wastewater Treatment Plants in Riyadh, Saudi Arabia
Source: MDPI journal article supplement (doi:10.3390/microorganisms11092167), 2023-08-27
Supplement: s1 [file s1]

**Table S1. Best fitting nucleotide substitution model for MCP gene**

| Model    | #Param | BIC         | AICc        | lnL          | Invariant  | Gamma | R          | Freq A      | Freq T      | Freq C      | Freq G      |
|----------|--------|-------------|-------------|--------------|------------|-------|------------|-------------|-------------|-------------|-------------|
| T92+G+I  | 81     | 2182.718804 | 1567.607324 | -702.3536008 | 0.47708895 | 0.05  | 2.40287187 | 0.324359838 | 0.324359838 | 0.175640162 | 0.175640162 |
| T92+G    | 80     | 2194.96806  | 1587.439646 | -713.2807691 | n/a        | 0.05  | 2.35310058 | 0.324359838 | 0.324359838 | 0.175640162 | 0.175640162 |
| HKY+G+I  | 83     | 2199.080457 | 1568.803663 | -700.9293455 | 0.47708895 | 0.05  | 2.43588235 | 0.309433962 | 0.339285714 | 0.143665768 | 0.207614555 |
| TN93+G+I | 84     | 2200.665357 | 1562.806317 | -696.919255  | 0.47708895 | 0.05  | 2.69371397 | 0.309433962 | 0.339285714 | 0.143665768 | 0.207614555 |
| HKY+G    | 82     | 2209.639805 | 1586.94553  | -711.0115603 | n/a        | 0.05  | 2.39655355 | 0.309433962 | 0.339285714 | 0.143665768 | 0.207614555 |
| TN93+G   | 83     | 2209.833026 | 1579.556231 | -706.30563   | n/a        | 0.05  | 2.74692616 | 0.309433962 | 0.339285714 | 0.143665768 | 0.207614555 |
| K2+G+I   | 80     | 2214.74469  | 1607.216277 | -723.1690842 | 0.47708895 | 0.05  | 2.37541268 | 0.25        | 0.25        | 0.25        | 0.25        |
| T92+I    | 80     | 2219.051271 | 1611.522858 | -725.3223749 | 0.47708895 | n/a   | 2.3213131  | 0.324359838 | 0.324359838 | 0.175640162 | 0.175640162 |
| JC+G+I   | 79     | 2219.388231 | 1619.443159 | -730.2933955 | 0.47708895 | 0.05  | 0.5        | 0.25        | 0.25        | 0.25        | 0.25        |
| GTR+G+I  | 87     | 2221.697112 | 1561.092981 | -693.0275099 | 0.47708895 | 0.05  | 2.53460908 | 0.309433962 | 0.339285714 | 0.143665768 | 0.207614555 |
| K2+G     | 79     | 2222.483714 | 1622.538642 | -731.8411369 | n/a        | 0.05  | 2.31776354 | 0.25        | 0.25        | 0.25        | 0.25        |
| JC+G     | 78     | 2230.621863 | 1638.260407 | -740.7127522 | n/a        | 0.05  | 0.5        | 0.25        | 0.25        | 0.25        | 0.25        |
| T92      | 79     | 2235.59135  | 1635.646279 | -738.394955  | n/a        | n/a   | 2.28154836 | 0.324359838 | 0.324359838 | 0.175640162 | 0.175640162 |
| GTR+G    | 86     | 2239.45725  | 1586.434542 | -706.7101197 | n/a        | 0.05  | 1.57291656 | 0.309433962 | 0.339285714 | 0.143665768 | 0.207614555 |
| HKY+I    | 82     | 2240.465695 | 1617.77142  | -726.4245053 | 0.47708895 | n/a   | 2.32751727 | 0.309433962 | 0.339285714 | 0.143665768 | 0.207614555 |
| TN93+I   | 83     | 2242.051554 | 1611.77476  | -722.4148941 | 0.47708895 | n/a   | 2.38725577 | 0.309433962 | 0.339285714 | 0.143665768 | 0.207614555 |
| K2+I     | 79     | 2248.145444 | 1648.200373 | -744.6720023 | 0.47708895 | n/a   | 2.28447512 | 0.25        | 0.25        | 0.25        | 0.25        |
| HKY      | 81     | 2250.229329 | 1635.117848 | -736.1088629 | n/a        | n/a   | 2.30631884 | 0.309433962 | 0.339285714 | 0.143665768 | 0.207614555 |
| TN93     | 82     | 2252.27421  | 1629.579935 | -732.3287626 | n/a        | n/a   | 2.30861883 | 0.309433962 | 0.339285714 | 0.143665768 | 0.207614555 |
| JC+I     | 78     | 2256.007261 | 1663.645806 | -753.4054515 | 0.47708895 | n/a   | 0.5        | 0.25        | 0.25        | 0.25        | 0.25        |
| K2       | 78     | 2263.912646 | 1671.55119  | -757.3581438 | n/a        | n/a   | 2.27898953 | 0.25        | 0.25        | 0.25        | 0.25        |
| GTR+I    | 86     | 2271.275119 | 1618.25241  | -722.6190542 | 0.47708895 | n/a   | 1.52578608 | 0.309433962 | 0.339285714 | 0.143665768 | 0.207614555 |
| JC       | 77     | 2271.866501 | 1687.088935 | -766.1376122 | n/a        | n/a   | 0.5        | 0.25        | 0.25        | 0.25        | 0.25        |
| GTR      | 85     | 2281.328756 | 1635.887745 | -732.4484137 | n/a        | n/a   | 1.52495106 | 0.309433962 | 0.339285714 | 0.143665768 | 0.207614555 |

Models with the lowest BIC scores (Bayesian Information Criterion) are considered to describe the substitution pattern the best. For each model, AICc value (Akaike Information Criterion, corrected), the Maximum Likelihood value (lnL), and the number of parameters (including branch lengths) are also presented. Non-uniformity of evolutionary rates among sites may be modeled by using a discrete Gamma distribution (+G) with 5 rate categories and by assuming that a certain fraction of sites is evolutionarily invariable (+I). Whenever applicable, estimates of gamma shape parameters and/or the estimated fraction of invariant sites are shown.

\*Abbreviations: TR: General Time Reversible; HKY: Hasegawa-Kishino-Yano; TN93: Tamura-Nei; T92: Tamura 3-parameter; K2: Kimura 2-parameter; JC: Jukes-Cantor

**Table S2. Sequences used for phylogenetic analysis of CrAssphage MCP gene.**

| <b>Accession number</b> | <b>Sequence nomination</b>                                   | <b>Abbreviated name used for phylogenetic tree</b> | <b>Country</b> | <b>Source</b> |
|-------------------------|--------------------------------------------------------------|----------------------------------------------------|----------------|---------------|
| <b>MK415410.1</b>       | MAG: CrAssphage YS1-2_2437, complete genome                  | CrAssphage/HuG/YS1-2_2437/JPN/2020                 | Japan          | human gut     |
| <b>MK415404.1</b>       | MAG: CrAssphage FA1-2_000172F, complete genome               | CrAssphage/HuG/FA1-2_000172F/JPN/2020              | Japan          | human gut     |
| <b>MK415403.1</b>       | MAG: CrAssphage ES_ALL_000190F, complete genome              | CrAssphage/HuG/ES_ALL_000190F/JPN/2020             | Japan          | human gut     |
| <b>OP075997.1</b>       | MAG: Bacteriophage sp. isolate 4010_21422, partial genome    | Phage/St/4010_21422/JPN/2023                       | Japan          | Stool         |
| <b>OP074799.1</b>       | MAG: Bacteriophage sp. isolate 2683_104905, partial genome   | Phage/St/2683_104905/JPN/2022                      | Japan          | Stool         |
| <b>OP074720.1</b>       | MAG: Bacteriophage sp. isolate 2574_5239, complete genome    | Phage/St/2574_5239/JPN/2022                        | Japan          | Stool         |
| <b>OP074321.1</b>       | MAG: Bacteriophage sp. isolate 1900_63868, partial genome    | Phage/St/1900_63868/JPN/2022                       | Japan          | Stool         |
| <b>OP076277.1</b>       | MAG: Bacteriophage sp. isolate PF-P005_31277, partial genome | Phage/St/PF-P005_31277/JPN/2023                    | Japan          | Stool         |
| <b>OP073281.1</b>       | MAG: Bacteriophage sp. isolate 0498_70082, partial genome    | Phage/St/0498_70082/JPN/2022                       | Japan          | Stool         |
| <b>OP072871.1</b>       | MAG: Bacteriophage sp. isolate 4238_99953, partial genome    | Phage/St/4238_99953/JPN/2022                       | Japan          | Stool         |
| <b>OP072508.1</b>       | MAG: Bacteriophage sp. isolate 3057_98020, partial genome    | Phage/St/3057_98020/JPN/2022                       | Japan          | Stool         |
| <b>OP074943.1</b>       | MAG: Bacteriophage sp. isolate 2837_61762, partial genome    | Phage/St/2837_61762/JPN/2023                       | Japan          | Stool         |
| <b>OP075029.1</b>       | MAG: Bacteriophage sp. isolate 2924_82214, complete genome   | Phage/St/2924_82214/JPN/2023                       | Japan          | Stool         |

|                   |                                                               |                                  |              |       |
|-------------------|---------------------------------------------------------------|----------------------------------|--------------|-------|
| <b>OP074295.1</b> | MAG: Bacteriophage sp. isolate 1876_43632, partial genome     | Phage/St/1876_43632/JPN/2022     | Japan        | Stool |
| <b>OP076471.1</b> | MAG: Bacteriophage sp. isolate 2073_87643, complete genome    | Phage/St/2073_87643/JPN/2023     | Japan        | Stool |
| <b>OP076275.1</b> | MAG: Bacteriophage sp. isolate PF-P004_38259, complete genome | Phage/St/PF-P004_38259/JPN/2023  | Japan        | Stool |
| <b>OP073779.1</b> | MAG: Bacteriophage sp. isolate 1248_77362, partial genome     | Phage/St/1248_77362/JPN/2022     | Japan        | Stool |
| <b>OP074030.1</b> | MAG: Bacteriophage sp. isolate 1563_44488, complete genome    | Phage/St/1563_44488/JPN/2022     | Japan        | Stool |
| <b>OP072814.1</b> | MAG: Bacteriophage sp. isolate 3980_139557, partial genome    | Phage/St/3980_139557/JPN/2022    | Japan        | Stool |
| <b>OP072735.1</b> | MAG: Bacteriophage sp. isolate 3729_82489, partial genome     | Phage/St/3729_82489/JPN/2022     | Japan        | Stool |
| <b>OP072612.1</b> | MAG: Bacteriophage sp. isolate 3394_67887, partial genome     | Phage/St/3394_67887/JPN/2022     | Japan        | Stool |
| <b>OP075973.1</b> | MAG: Bacteriophage sp. isolate 3979_5654, complete genome     | Phage/St/3979_5654/JPN/2023      | Japan        | Stool |
| <b>OP075609.1</b> | MAG: Bacteriophage sp. isolate 3552_133772, partial genome    | Phage/St/3552_133772/JPN/2023    | Japan        | Stool |
| <b>OP075575.1</b> | MAG: Bacteriophage sp. isolate 3519_63130, complete genome    | Phage/St/3519_63130/JPN/2023     | Japan        | Stool |
| <b>OP076364.1</b> | MAG: Bacteriophage sp. isolate 1951_41738, partial genome     | Phage/St/1951_41738/JPN/2023     | Japan        | Stool |
| <b>OP076307.1</b> | MAG: Bacteriophage sp. isolate PF-P050_93161, complete genome | Phage/St/PF-P050_93161/JPN/2023  | Japan        | Stool |
| <b>OP074053.1</b> | MAG: Bacteriophage sp. isolate 1602_50323, partial genome     | Phage/St/1602_50323/JPN/2022     | Japan        | Stool |
| <b>OP075587.1</b> | MAG: Bacteriophage sp. isolate 3531_60876, partial genome     | Phage/St/3531_60876/JPN/2023     | Japan        | Stool |
| <b>MW067002.1</b> | CrAssphage sp. C0526BW15, complete genome                     | CrAssphage/St/C0526BW15/RSA/2020 | South Africa | Stool |
| <b>OP076106.1</b> | MAG: Bacteriophage sp. isolate 4168_14180, partial genome     | Phage/St/4168_14180/JPN/2023     | Japan        | Stool |

|                    |                                                               |                                            |        |           |
|--------------------|---------------------------------------------------------------|--------------------------------------------|--------|-----------|
| <b>OP075991.1</b>  | MAG: Bacteriophage sp. isolate 4004_62614, complete genome    | Phage/St/4004_62614/JPN/2023               | Japan  | Stool     |
| <b>OP075298.1</b>  | MAG: Human gut phage 3206_30171 isolate 3206, complete genome | Phage/St/3206/JPN/2023                     | Japan  | Stool     |
| <b>OP075072.1</b>  | MAG: Bacteriophage sp. isolate 2959_55556, complete genome    | Phage/St/2959_55556/JPN/2023               | Japan  | Stool     |
| <b>OP074885.1</b>  | MAG: Bacteriophage sp. isolate 2775_102739, partial genome    | Phage/St/2775_102739/JPN/2022              | Japan  | Stool     |
| <b>MT006214.1</b>  | CrAssphage LMMB, complete genome                              | CrAssphage/HuG/LMMB/RUS/2020               | Russia | human gut |
| <b>OP075053.1</b>  | MAG: Bacteriophage sp. isolate 2938_98355, complete genome    | Phage/St/2938_98355/JPN/2023               | Japan  | Stool     |
| OP073373.1         | MAG: Bacteriophage sp. isolate 0634_44215, partial genome     | Phage/St/0634_44215/JPN/2022               | Japan  | Stool     |
| <b>OP073355.1</b>  | MAG: Bacteriophage sp. isolate 0597_88707, partial genome     | Phage/St/0597_88707/JPN/2022               | Japan  | Stool     |
| <b>OP072853.1</b>  | MAG: Bacteriophage sp. isolate 4174_71253, partial genome     | Phage/St/4174_71253/JPN/2022               | Japan  | Stool     |
| <b>OP072840.1</b>  | MAG: Bacteriophage sp. isolate 4078_53722, partial genome     | Phage/St/4078_53722/JPN/2022               | Japan  | Stool     |
| <b>OP072650.1</b>  | MAG: Bacteriophage sp. isolate 3478_90668, partial genome     | Phage/St/3478_90668/JPN/2022               | Japan  | Stool     |
| <b>OP072305.1</b>  | MAG: Bacteriophage sp. isolate 2423_107994, partial genome    | Phage/St/2423_107994/JPN/2022              | Japan  | Stool     |
| <b>OP031092.1</b>  | MAG: Bacteriophage sp. isolate 1943_49361, partial genome     | Phage/St/1943_49361/JPN/2022               | Japan  | Stool     |
| <b>NC_067194.1</b> | MAG: Carjivirus communis, complete genome                     | CrAssphage/St/Carjivirus communis/USA/2023 | USA    | Stool     |
| <b>OP075939.1</b>  | MAG: Bacteriophage sp. isolate 3938_15233, partial genome     | Phage/St/3938_15233/JPN/2023               | Japan  | Stool     |
| <b>OP076023.1</b>  | MAG: Bacteriophage sp. isolate 3618_34927, partial genome     | Phage/St/4039_63241/JPN/2023               | Japan  | Stool     |
| <b>OP075667.1</b>  | MAG: Bacteriophage sp. isolate 3618_34927, partial genome     | Phage/St/3618_34927/JPN/2023               | Japan  | Stool     |

|                   |                                                             |                               |              |       |
|-------------------|-------------------------------------------------------------|-------------------------------|--------------|-------|
| <b>MK238400.1</b> | CrAssphage ZA, complete genome                              | CrAssphage/St/ZA/RSA/2019     | South Africa | Stool |
| <b>OP074690.1</b> | MAG: Bacteriophage sp. isolate 2547_27076, partial genome   | Phage/St/2547_27076/JPN/2022  | Japan        | Stool |
| <b>OP030754.1</b> | MAG: Bacteriophage sp. isolate 0138_31247, partial genome   | Phage/St/0138_31247/JPN/2022  | Japan        | Stool |
| <b>OP075981.1</b> | MAG: Bacteriophage sp. isolate 3993_101156, complete genome | Phage/St/3993_101156/JPN/2023 | Japan        | Stool |
| <b>OP075724.1</b> | MAG: Bacteriophage sp. isolate 3689_37730, partial genome   | Phage/St/3689_37730/JPN/2023  | Japan        | Stool |
| <b>OP075432.1</b> | MAG: Bacteriophage sp. isolate 3376_53066, partial genome   | Phage/St/3376_53066/JPN/2023  | Japan        | Stool |
| <b>OP075342.1</b> | MAG: Bacteriophage sp. isolate 3253_10036, complete genome  | Phage/St/3253_10036/JPN/2023  | Japan        | Stool |
| <b>OP075276.1</b> | MAG: Bacteriophage sp. isolate 3184_74577, partial genome   | Phage/St/3184_74577/JPN/2023  | Japan        | Stool |
| <b>OP074902.1</b> | MAG: Bacteriophage sp. isolate 2797_3646, partial genome    | Phage/St/2797_3646/JPN/2022   | Japan        | Stool |
| <b>OP072294.1</b> | MAG: Bacteriophage sp. isolate 2404_93771, partial genome   | Phage/St/2404_93771/JPN/2022  | Japan        | Stool |
| <b>OP030879.1</b> | MAG: Bacteriophage sp. isolate 1043_114173, partial genome  | Phage/St/1043_114173/JPN/2022 | Japan        | Stool |
| <b>OP030856.1</b> | MAG: Bacteriophage sp. isolate 0963_33341, partial genome   | Phage/St/0963_33341/JPN/2022  | Japan        | Stool |
| <b>OP076186.1</b> | MAG: Bacteriophage sp. isolate 4255_5393, partial genome    | Phage/St/4255_5393/JPN/2023   | Japan        | Stool |
| <b>OP074053.1</b> | MAG: Bacteriophage sp. isolate 1602_50323, partial genome   | Phage/St/1602_50323/JPN/2022  | Japan        | Stool |
| <b>OP074133.1</b> | MAG: Bacteriophage sp. isolate 1697_68134, complete genome  | Phage/St/1697_68134/JPN/2022  | Japan        | Stool |
| <b>OP030839.1</b> | MAG: Bacteriophage sp. isolate 0854_68857, partial genome   | Phage/St/0854_68857/JPN/2022  | Japan        | Stool |
| <b>OP072689.1</b> | MAG: Bacteriophage sp. isolate 3589_105980, partial genome  | Phage/St/3589_105980/JPN/2022 | Japan        | Stool |

|                   |                                                              |                                  |       |       |
|-------------------|--------------------------------------------------------------|----------------------------------|-------|-------|
| <b>OP072302.1</b> | MAG: Bacteriophage sp. isolate<br>2414_53161, partial genome | Phage/St/2414_53161/JPN/2<br>022 | Japan | Stool |
| <b>OP072214.1</b> | MAG: Bacteriophage sp. isolate<br>2110_71125, partial genome | Phage/St/2110_71125/JPN/2<br>022 | Japan | Stool |
| <b>OP031015.1</b> | MAG: Bacteriophage sp. isolate<br>1675_92049, partial genome | Phage/St/1675_92049/JPN/2<br>022 | Japan | Stool |

**Table S3.** Estimates of Evolutionary Divergence between Sequences of the MCP protein. The red borders refer to the closest distance with current studied sequences.

| Species 1                        | Species 2                              | Dist              |
|----------------------------------|----------------------------------------|-------------------|
| <b>CrAssphage/WW/2M/SA/2022</b>  | <b>Phage/St/3057 98020/JPN/2022</b>    | <b>0.00000000</b> |
| <b>CrAssphage/WW/2M/SA/2022</b>  | <b>Phage/St/2683 104905/JPN/2022</b>   | <b>0.00000000</b> |
| <b>CrAssphage/WW/2M/SA/2022</b>  | <b>Phage/St/4238 99953/JPN/2022</b>    | <b>0.00000000</b> |
| CrAssphage/WW/2M/SA/2022         | CrAssphage/WW/7E/SA/2022               | 0.00281722        |
| <b>CrAssphage/WW/7E/SA/2022</b>  | <b>Phage/St/3057 98020/JPN/2022</b>    | <b>0.00281722</b> |
| CrAssphage/WW/2M/SA/2022         | Phage/St/3729 82489/JPN/2022           | 0.00281722        |
| <b>CrAssphage/WW/12U/SA/2022</b> | <b>Phage/St/3729 82489/JPN/2022</b>    | <b>0.00281722</b> |
| CrAssphage/WW/7E/SA/2022         | Phage/St/2683 104905/JPN/2022          | 0.00281722        |
| CrAssphage/WW/7E/SA/2022         | Phage/St/4238 99953/JPN/2022           | 0.00281722        |
| <b>CrAssphage/WW/2M/SA/2022</b>  | <b>CrAssphage/WW/12E/SA/2022</b>       | <b>0.00281728</b> |
| <b>CrAssphage/WW/12E/SA/2022</b> | <b>Phage/St/3057 98020/JPN/2022</b>    | <b>0.00281728</b> |
| <b>CrAssphage/WW/5U/SA/2022</b>  | <b>Phage/St/3729 82489/JPN/2022</b>    | <b>0.00281728</b> |
| <b>CrAssphage/WW/12E/SA/2022</b> | <b>Phage/St/2683 104905/JPN/2022</b>   | <b>0.00281728</b> |
| <b>CrAssphage/WW/12E/SA/2022</b> | <b>Phage/St/4238 99953/JPN/2022</b>    | <b>0.00281728</b> |
| CrAssphage/WW/5U/SA/2022         | CrAssphage/WW/12E/SA/2022              | 0.00281735        |
| CrAssphage/WW/12E/SA/2022        | Phage/St/1876 43632/JPN/2022           | 0.00281735        |
| CrAssphage/WW/2M/SA/2022         | Phage/St/2073 87643/JPN/2023           | 0.00286957        |
| CrAssphage/WW/2M/SA/2022         | Phage/St/3980 139557/JPN/2022          | 0.00286957        |
| CrAssphage/WW/5U/SA/2022         | Phage/St/2938 98355/JPN/2023           | 0.00287020        |
| CrAssphage/WW/5U/SA/2022         | Phage/St/0634 44215/JPN/2022           | 0.00287020        |
| CrAssphage/WW/5U/SA/2022         | Phage/St/0597 88707/JPN/2022           | 0.00287020        |
| CrAssphage/WW/5U/SA/2022         | Phage/St/4174 71253/JPN/2022           | 0.00287020        |
| CrAssphage/WW/5U/SA/2022         | Phage/St/3478 90668/JPN/2022           | 0.00287020        |
| CrAssphage/WW/5U/SA/2022         | Phage/St/2423 107994/JPN/2022          | 0.00287020        |
| CrAssphage/WW/2M/SA/2022         | Phage/St/1876 43632/JPN/2022           | 0.00287020        |
| CrAssphage/WW/2M/SA/2022         | Phage/St/PF-P004 38259/JPN/2023        | 0.00287020        |
| CrAssphage/WW/12E/SA/2022        | Phage/St/1043 114173/JPN/2022          | 0.00287085        |
| CrAssphage/WW/12E/SA/2022        | CrAssphage/HuG/YS1-2 2437/JPN/2020     | 0.00287085        |
| CrAssphage/WW/12E/SA/2022        | CrAssphage/HuG/FA1-2 000172F/JPN/2020  | 0.00287085        |
| CrAssphage/WW/12E/SA/2022        | CrAssphage/HuG/ES ALL 000190F/JPN/2020 | 0.00287085        |
| CrAssphage/WW/12E/SA/2022        | Phage/St/PF-P005 31277/JPN/2023        | 0.00287085        |
| CrAssphage/WW/12E/SA/2022        | Phage/St/0498 70082/JPN/2022           | 0.00287085        |
| CrAssphage/WW/7E/SA/2022         | Phage/St/2073 87643/JPN/2023           | 0.00585459        |
| CrAssphage/WW/7E/SA/2022         | Phage/St/3980 139557/JPN/2022          | 0.00585459        |
| CrAssphage/WW/12E/SA/2022        | Phage/St/2073 87643/JPN/2023           | 0.00585498        |
| CrAssphage/WW/12E/SA/2022        | Phage/St/3980 139557/JPN/2022          | 0.00585498        |
| CrAssphage/WW/12E/SA/2022        | Phage/St/2938 98355/JPN/2023           | 0.00585538        |
| CrAssphage/WW/12E/SA/2022        | Phage/St/0634 44215/JPN/2022           | 0.00585538        |
| CrAssphage/WW/12E/SA/2022        | Phage/St/0597 88707/JPN/2022           | 0.00585538        |
| CrAssphage/WW/12E/SA/2022        | Phage/St/4174 71253/JPN/2022           | 0.00585538        |
| CrAssphage/WW/12E/SA/2022        | Phage/St/3478 90668/JPN/2022           | 0.00585538        |
| CrAssphage/WW/12E/SA/2022        | Phage/St/2423 107994/JPN/2022          | 0.00585538        |
| CrAssphage/WW/7E/SA/2022         | Phage/St/1876 43632/JPN/2022           | 0.00585538        |



|                                 |                                               |                   |
|---------------------------------|-----------------------------------------------|-------------------|
| CrAssphage/WW/2M/SA/2022        | Phage/St/1900 63868/JPN/2022                  | 0.00585538        |
| CrAssphage/WW/7E/SA/2022        | Phage/St/PF-P004 38259/JPN/2023               | 0.00585538        |
| CrAssphage/WW/2M/SA/2022        | Phage/St/1043 114173/JPN/2022                 | 0.00585579        |
| CrAssphage/WW/12E/SA/2022       | Phage/St/PF-P004 38259/JPN/2023               | 0.00585579        |
| CrAssphage/WW/2M/SA/2022        | CrAssphage/HuG/YS1-2 2437/JPN/2020            | 0.00585579        |
| CrAssphage/WW/2M/SA/2022        | CrAssphage/HuG/FA1-2 000172F/JPN/2020         | 0.00585579        |
| CrAssphage/WW/2M/SA/2022        | CrAssphage/HuG/ES ALL 000190F/JPN/2020        | 0.00585579        |
| CrAssphage/WW/2M/SA/2022        | Phage/St/PF-P005 31277/JPN/2023               | 0.00585579        |
| CrAssphage/WW/2M/SA/2022        | Phage/St/0498 70082/JPN/2022                  | 0.00585579        |
| <b>CrAssphage/WW/4E/SA/2022</b> | <b>Phage/St/1043 114173/JPN/2022</b>          | <b>0.00585620</b> |
| CrAssphage/WW/5U/SA/2022        | Phage/St/1043 114173/JPN/2022                 | 0.00585620        |
| <b>CrAssphage/WW/4E/SA/2022</b> | <b>CrAssphage/HuG/YS1-2 2437/JPN/2020</b>     | <b>0.00585620</b> |
| CrAssphage/WW/5U/SA/2022        | CrAssphage/HuG/YS1-2 2437/JPN/2020            | 0.00585620        |
| <b>CrAssphage/WW/4E/SA/2022</b> | <b>CrAssphage/HuG/FA1-2 000172F/JPN/2020</b>  | <b>0.00585620</b> |
| CrAssphage/WW/5U/SA/2022        | CrAssphage/HuG/FA1-2 000172F/JPN/2020         | 0.00585620        |
| <b>CrAssphage/WW/4E/SA/2022</b> | <b>CrAssphage/HuG/ES ALL 000190F/JPN/2020</b> | <b>0.00585620</b> |
| CrAssphage/WW/5U/SA/2022        | CrAssphage/HuG/ES ALL 000190F/JPN/2020        | 0.00585620        |
| <b>CrAssphage/WW/1E/SA/2022</b> | <b>Phage/St/1900 63868/JPN/2022</b>           | <b>0.00585620</b> |
| CrAssphage/WW/4E/SA/2022        | Phage/St/PF-P005 31277/JPN/2023               | 0.00585620        |
| CrAssphage/WW/5U/SA/2022        | Phage/St/PF-P005 31277/JPN/2023               | 0.00585620        |
| CrAssphage/WW/4E/SA/2022        | Phage/St/0498 70082/JPN/2022                  | 0.00585620        |
| CrAssphage/WW/5U/SA/2022        | Phage/St/0498 70082/JPN/2022                  | 0.00585620        |
| CrAssphage/WW/1E/SA/2022        | Phage/St/1043 114173/JPN/2022                 | 0.00585662        |
| CrAssphage/WW/1E/SA/2022        | CrAssphage/HuG/YS1-2 2437/JPN/2020            | 0.00585662        |
| CrAssphage/WW/1E/SA/2022        | CrAssphage/HuG/FA1-2 000172F/JPN/2020         | 0.00585662        |
| CrAssphage/WW/1E/SA/2022        | CrAssphage/HuG/ES ALL 000190F/JPN/2020        | 0.00585662        |
| CrAssphage/WW/1E/SA/2022        | Phage/St/PF-P005 31277/JPN/2023               | 0.00585662        |
| CrAssphage/WW/1E/SA/2022        | Phage/St/0498 70082/JPN/2022                  | 0.00585662        |
| <b>CrAssphage/WW/3E/SA/2022</b> | <b>Phage/St/2073 87643/JPN/2023</b>           | <b>0.00589505</b> |
| <b>CrAssphage/WW/3E/SA/2022</b> | <b>Phage/St/3980 139557/JPN/2022</b>          | <b>0.00589505</b> |
| CrAssphage/WW/2M/SA/2022        | CrAssphage/WW/3E/SA/2022                      | 0.00589533        |
| CrAssphage/WW/2M/SA/2022        | CrAssphage/WW/12U/SA/2022                     | 0.00589533        |
| CrAssphage/WW/3E/SA/2022        | Phage/St/3057 98020/JPN/2022                  | 0.00589533        |
| CrAssphage/WW/12U/SA/2022       | Phage/St/3057 98020/JPN/2022                  | 0.00589533        |
| CrAssphage/WW/7E/SA/2022        | Phage/St/3729 82489/JPN/2022                  | 0.00589533        |
| CrAssphage/WW/3E/SA/2022        | Phage/St/2683 104905/JPN/2022                 | 0.00589533        |
| CrAssphage/WW/12U/SA/2022       | Phage/St/2683 104905/JPN/2022                 | 0.00589533        |
| CrAssphage/WW/3E/SA/2022        | Phage/St/4238 99953/JPN/2022                  | 0.00589533        |
| CrAssphage/WW/12U/SA/2022       | Phage/St/4238 99953/JPN/2022                  | 0.00589533        |
| CrAssphage/WW/2M/SA/2022        | CrAssphage/WW/5U/SA/2022                      | 0.00589560        |
| CrAssphage/WW/7E/SA/2022        | CrAssphage/WW/12E/SA/2022                     | 0.00589560        |
| CrAssphage/WW/5U/SA/2022        | CrAssphage/WW/12U/SA/2022                     | 0.00589560        |
| CrAssphage/WW/5U/SA/2022        | Phage/St/3057 98020/JPN/2022                  | 0.00589560        |
| CrAssphage/WW/12E/SA/2022       | Phage/St/3729 82489/JPN/2022                  | 0.00589560        |
| CrAssphage/WW/5U/SA/2022        | Phage/St/2683 104905/JPN/2022                 | 0.00589560        |
| CrAssphage/WW/5U/SA/2022        | Phage/St/4238 99953/JPN/2022                  | 0.00589560        |
| CrAssphage/WW/4E/SA/2022        | Phage/St/4255 5393/JPN/2023                   | 0.00589588        |
| CrAssphage/WW/4E/SA/2022        | Phage/St/3206/JPN/2023                        | 0.00589588        |

|                           |                                        |            |
|---------------------------|----------------------------------------|------------|
| CrAssphage/WW/4E/SA/2022  | Phage/St/2775 102739/JPN/2022          | 0.00589588 |
| CrAssphage/WW/5U/SA/2022  | Phage/St/1876 43632/JPN/2022           | 0.00589588 |
| CrAssphage/WW/3E/SA/2022  | CrAssphage/WW/10E/SA/2022              | 0.00612073 |
| CrAssphage/WW/2M/SA/2022  | Phage/St/3519 63130/JPN/2023           | 0.00612073 |
| CrAssphage/WW/2M/SA/2022  | Phage/St/1602 50323/JPN/2022           | 0.00612073 |
| CrAssphage/WW/1E/SA/2022  | CrAssphage/WW/2M/SA/2022               | 0.00612353 |
| CrAssphage/WW/4E/SA/2022  | CrAssphage/WW/5U/SA/2022               | 0.00612353 |
| CrAssphage/WW/4E/SA/2022  | Phage/St/4004 62614/JPN/2023           | 0.00612353 |
| CrAssphage/WW/1E/SA/2022  | Phage/St/3057 98020/JPN/2022           | 0.00612353 |
| CrAssphage/WW/1E/SA/2022  | Phage/St/2683 104905/JPN/2022          | 0.00612353 |
| CrAssphage/WW/12E/SA/2022 | Phage/St/1900 63868/JPN/2022           | 0.00612353 |
| CrAssphage/WW/1E/SA/2022  | Phage/St/4238 99953/JPN/2022           | 0.00612353 |
| CrAssphage/WW/12U/SA/2022 | Phage/St/2073 87643/JPN/2023           | 0.00911067 |
| CrAssphage/WW/12U/SA/2022 | Phage/St/3980 139557/JPN/2022          | 0.00911067 |
| CrAssphage/WW/2M/SA/2022  | Phage/St/2938 98355/JPN/2023           | 0.00911129 |
| CrAssphage/WW/12U/SA/2022 | Phage/St/2938 98355/JPN/2023           | 0.00911129 |
| CrAssphage/WW/2M/SA/2022  | Phage/St/0634 44215/JPN/2022           | 0.00911129 |
| CrAssphage/WW/12U/SA/2022 | Phage/St/0634 44215/JPN/2022           | 0.00911129 |
| CrAssphage/WW/2M/SA/2022  | Phage/St/0597 88707/JPN/2022           | 0.00911129 |
| CrAssphage/WW/12U/SA/2022 | Phage/St/0597 88707/JPN/2022           | 0.00911129 |
| CrAssphage/WW/2M/SA/2022  | Phage/St/4174 71253/JPN/2022           | 0.00911129 |
| CrAssphage/WW/12U/SA/2022 | Phage/St/4174 71253/JPN/2022           | 0.00911129 |
| CrAssphage/WW/2M/SA/2022  | Phage/St/3478 90668/JPN/2022           | 0.00911129 |
| CrAssphage/WW/12U/SA/2022 | Phage/St/3478 90668/JPN/2022           | 0.00911129 |
| CrAssphage/WW/2M/SA/2022  | Phage/St/2423 107994/JPN/2022          | 0.00911129 |
| CrAssphage/WW/12U/SA/2022 | Phage/St/2423 107994/JPN/2022          | 0.00911129 |
| CrAssphage/WW/3E/SA/2022  | Phage/St/3519 63130/JPN/2023           | 0.00911129 |
| CrAssphage/WW/3E/SA/2022  | Phage/St/1602 50323/JPN/2022           | 0.00911129 |
| CrAssphage/WW/5U/SA/2022  | Phage/St/2073 87643/JPN/2023           | 0.00911129 |
| CrAssphage/WW/5U/SA/2022  | Phage/St/3980 139557/JPN/2022          | 0.00911129 |
| CrAssphage/WW/3E/SA/2022  | Phage/St/1876 43632/JPN/2022           | 0.00911192 |
| CrAssphage/WW/12U/SA/2022 | Phage/St/1876 43632/JPN/2022           | 0.00911192 |
| CrAssphage/WW/3E/SA/2022  | Phage/St/PF-P004 38259/JPN/2023        | 0.00911192 |
| CrAssphage/WW/12U/SA/2022 | Phage/St/PF-P004 38259/JPN/2023        | 0.00911192 |
| CrAssphage/WW/7E/SA/2022  | Phage/St/1900 63868/JPN/2022           | 0.00911192 |
| CrAssphage/WW/7E/SA/2022  | Phage/St/1043 114173/JPN/2022          | 0.00911256 |
| CrAssphage/WW/5U/SA/2022  | Phage/St/PF-P004 38259/JPN/2023        | 0.00911256 |
| CrAssphage/WW/7E/SA/2022  | CrAssphage/HuG/YS1-2 2437/JPN/2020     | 0.00911256 |
| CrAssphage/WW/7E/SA/2022  | CrAssphage/HuG/FA1-2 000172F/JPN/2020  | 0.00911256 |
| CrAssphage/WW/7E/SA/2022  | CrAssphage/HuG/ES ALL 000190F/JPN/2020 | 0.00911256 |
| CrAssphage/WW/7E/SA/2022  | Phage/St/PF-P005 31277/JPN/2023        | 0.00911256 |
| CrAssphage/WW/7E/SA/2022  | Phage/St/0498 70082/JPN/2022           | 0.00911256 |
| CrAssphage/WW/3E/SA/2022  | CrAssphage/WW/7E/SA/2022               | 0.00926260 |
| CrAssphage/WW/7E/SA/2022  | CrAssphage/WW/12U/SA/2022              | 0.00926260 |
| CrAssphage/WW/3E/SA/2022  | Phage/St/3729 82489/JPN/2022           | 0.00926260 |
| CrAssphage/WW/5U/SA/2022  | CrAssphage/WW/7E/SA/2022               | 0.00926326 |
| CrAssphage/WW/3E/SA/2022  | CrAssphage/WW/12E/SA/2022              | 0.00926326 |
| CrAssphage/WW/12E/SA/2022 | CrAssphage/WW/12U/SA/2022              | 0.00926326 |

|                                  |                                       |                   |
|----------------------------------|---------------------------------------|-------------------|
| CrAssphage/WW/12E/SA/2022        | Phage/St/3938 15233/JPN/2023          | 0.00929717        |
| CrAssphage/WW/7E/SA/2022         | Phage/St/3519 63130/JPN/2023          | 0.00929717        |
| CrAssphage/WW/7E/SA/2022         | Phage/St/1602 50323/JPN/2022          | 0.00929717        |
| CrAssphage/WW/4E/SA/2022         | Phage/St/3729 82489/JPN/2022          | 0.00929871        |
| CrAssphage/WW/12E/SA/2022        | Phage/St/3519 63130/JPN/2023          | 0.00929871        |
| CrAssphage/WW/12E/SA/2022        | Phage/St/1602 50323/JPN/2022          | 0.00929871        |
| CrAssphage/WW/1E/SA/2022         | CrAssphage/WW/7E/SA/2022              | 0.00930027        |
| CrAssphage/WW/4E/SA/2022         | CrAssphage/WW/12E/SA/2022             | 0.00930027        |
| CrAssphage/WW/12E/SA/2022        | Phage/St/4255 5393/JPN/2023           | 0.00930027        |
| <b>CrAssphage/WW/10E/SA/2022</b> | <b>Phage/St/3253 10036/JPN/2023</b>   | <b>0.00930027</b> |
| <b>CrAssphage/WW/10E/SA/2022</b> | <b>Phage/St/2797 3646/JPN/2022</b>    | <b>0.00930027</b> |
| CrAssphage/WW/12E/SA/2022        | Phage/St/3206/JPN/2023                | 0.00930027        |
| CrAssphage/WW/12E/SA/2022        | Phage/St/2775 102739/JPN/2022         | 0.00930027        |
| CrAssphage/WW/3E/SA/2022         | Phage/St/3552 133772/JPN/2023         | 0.00930027        |
| CrAssphage/WW/1E/SA/2022         | Phage/St/3729 82489/JPN/2022          | 0.00930027        |
| CrAssphage/WW/4E/SA/2022         | Phage/St/1900 63868/JPN/2022          | 0.00930027        |
| CrAssphage/WW/5U/SA/2022         | Phage/St/1900 63868/JPN/2022          | 0.00930027        |
| CrAssphage/WW/1E/SA/2022         | CrAssphage/WW/12E/SA/2022             | 0.00930185        |
| CrAssphage/WW/2M/SA/2022         | Phage/St/3938 15233/JPN/2023          | 0.00980249        |
| CrAssphage/WW/2M/SA/2022         | Phage/St/4255 5393/JPN/2023           | 0.00980929        |
| CrAssphage/WW/4E/SA/2022         | Phage/St/2938 98355/JPN/2023          | 0.00980929        |
| CrAssphage/WW/4E/SA/2022         | Phage/St/0634 44215/JPN/2022          | 0.00980929        |
| CrAssphage/WW/4E/SA/2022         | Phage/St/0597 88707/JPN/2022          | 0.00980929        |
| CrAssphage/WW/4E/SA/2022         | Phage/St/4174 71253/JPN/2022          | 0.00980929        |
| CrAssphage/WW/4E/SA/2022         | Phage/St/3478 90668/JPN/2022          | 0.00980929        |
| CrAssphage/WW/4E/SA/2022         | Phage/St/2423 107994/JPN/2022         | 0.00980929        |
| CrAssphage/WW/2M/SA/2022         | Phage/St/3206/JPN/2023                | 0.00980929        |
| CrAssphage/WW/2M/SA/2022         | Phage/St/2775 102739/JPN/2022         | 0.00980929        |
| CrAssphage/WW/1E/SA/2022         | Phage/St/2073 87643/JPN/2023          | 0.00980929        |
| CrAssphage/WW/1E/SA/2022         | Phage/St/3980 139557/JPN/2022         | 0.00980929        |
| CrAssphage/WW/1E/SA/2022         | Phage/St/4255 5393/JPN/2023           | 0.00981626        |
| CrAssphage/WW/1E/SA/2022         | Phage/St/3206/JPN/2023                | 0.00981626        |
| CrAssphage/WW/1E/SA/2022         | Phage/St/2775 102739/JPN/2022         | 0.00981626        |
| CrAssphage/WW/1E/SA/2022         | Phage/St/1876 43632/JPN/2022          | 0.00981626        |
| CrAssphage/WW/1E/SA/2022         | Phage/St/PF-P004 38259/JPN/2023       | 0.00981626        |
| CrAssphage/WW/7E/SA/2022         | Phage/St/2938 98355/JPN/2023          | 0.01266775        |
| CrAssphage/WW/7E/SA/2022         | Phage/St/0634 44215/JPN/2022          | 0.01266775        |
| CrAssphage/WW/7E/SA/2022         | Phage/St/0597 88707/JPN/2022          | 0.01266775        |
| CrAssphage/WW/7E/SA/2022         | Phage/St/4174 71253/JPN/2022          | 0.01266775        |
| CrAssphage/WW/7E/SA/2022         | Phage/St/3478 90668/JPN/2022          | 0.01266775        |
| CrAssphage/WW/7E/SA/2022         | Phage/St/2423 107994/JPN/2022         | 0.01266775        |
| CrAssphage/WW/3E/SA/2022         | Phage/St/1900 63868/JPN/2022          | 0.01266879        |
| CrAssphage/WW/12U/SA/2022        | Phage/St/1900 63868/JPN/2022          | 0.01266879        |
| CrAssphage/WW/3E/SA/2022         | Phage/St/1043 114173/JPN/2022         | 0.01266983        |
| CrAssphage/WW/12U/SA/2022        | Phage/St/1043 114173/JPN/2022         | 0.01266983        |
| CrAssphage/WW/3E/SA/2022         | CrAssphage/HuG/YS1-2 2437/JPN/2020    | 0.01266983        |
| CrAssphage/WW/12U/SA/2022        | CrAssphage/HuG/YS1-2 2437/JPN/2020    | 0.01266983        |
| CrAssphage/WW/3E/SA/2022         | CrAssphage/HuG/FA1-2 000172F/JPN/2020 | 0.01266983        |

|                           |                                        |            |
|---------------------------|----------------------------------------|------------|
| CrAssphage/WW/12U/SA/2022 | CrAssphage/HuG/FA1-2 000172F/JPN/2020  | 0.01266983 |
| CrAssphage/WW/3E/SA/2022  | CrAssphage/HuG/ES ALL 000190F/JPN/2020 | 0.01266983 |
| CrAssphage/WW/12U/SA/2022 | CrAssphage/HuG/ES ALL 000190F/JPN/2020 | 0.01266983 |
| CrAssphage/WW/3E/SA/2022  | Phage/St/PF-P005 31277/JPN/2023        | 0.01266983 |
| CrAssphage/WW/12U/SA/2022 | Phage/St/PF-P005 31277/JPN/2023        | 0.01266983 |
| CrAssphage/WW/3E/SA/2022  | Phage/St/0498 70082/JPN/2022           | 0.01266983 |
| CrAssphage/WW/12U/SA/2022 | Phage/St/0498 70082/JPN/2022           | 0.01266983 |
| CrAssphage/WW/3E/SA/2022  | Phage/St/3938 15233/JPN/2023           | 0.01275483 |
| CrAssphage/WW/10E/SA/2022 | Phage/St/2073 87643/JPN/2023           | 0.01275483 |
| CrAssphage/WW/10E/SA/2022 | Phage/St/3980 139557/JPN/2022          | 0.01275483 |
| CrAssphage/WW/2M/SA/2022  | CrAssphage/WW/10E/SA/2022              | 0.01275665 |
| CrAssphage/WW/5U/SA/2022  | Phage/St/3938 15233/JPN/2023           | 0.01275665 |
| CrAssphage/WW/12U/SA/2022 | Phage/St/3519 63130/JPN/2023           | 0.01275665 |
| CrAssphage/WW/12U/SA/2022 | Phage/St/1602 50323/JPN/2022           | 0.01275665 |
| CrAssphage/WW/10E/SA/2022 | Phage/St/3057 98020/JPN/2022           | 0.01275665 |
| CrAssphage/WW/10E/SA/2022 | Phage/St/2683 104905/JPN/2022          | 0.01275665 |
| CrAssphage/WW/10E/SA/2022 | Phage/St/4238 99953/JPN/2022           | 0.01275665 |
| CrAssphage/WW/2M/SA/2022  | CrAssphage/WW/4E/SA/2022               | 0.01275849 |
| CrAssphage/WW/4E/SA/2022  | Phage/St/3057 98020/JPN/2022           | 0.01275849 |
| CrAssphage/WW/4E/SA/2022  | Phage/St/2683 104905/JPN/2022          | 0.01275849 |
| CrAssphage/WW/4E/SA/2022  | Phage/St/4238 99953/JPN/2022           | 0.01275849 |
| CrAssphage/WW/4E/SA/2022  | CrAssphage/WW/12U/SA/2022              | 0.01275849 |
| CrAssphage/WW/5U/SA/2022  | Phage/St/3519 63130/JPN/2023           | 0.01275849 |
| CrAssphage/WW/5U/SA/2022  | Phage/St/1602 50323/JPN/2022           | 0.01275849 |
| CrAssphage/WW/1E/SA/2022  | CrAssphage/WW/3E/SA/2022               | 0.01276035 |
| CrAssphage/WW/1E/SA/2022  | CrAssphage/WW/12U/SA/2022              | 0.01276035 |
| CrAssphage/WW/5U/SA/2022  | Phage/St/4255 5393/JPN/2023            | 0.01276035 |
| CrAssphage/WW/5U/SA/2022  | Phage/St/3206/JPN/2023                 | 0.01276035 |
| CrAssphage/WW/5U/SA/2022  | Phage/St/2775 102739/JPN/2022          | 0.01276035 |
| CrAssphage/WW/4E/SA/2022  | Phage/St/1876 43632/JPN/2022           | 0.01276035 |
| CrAssphage/WW/1E/SA/2022  | CrAssphage/WW/4E/SA/2022               | 0.01276224 |
| CrAssphage/WW/1E/SA/2022  | CrAssphage/WW/5U/SA/2022               | 0.01276224 |
| CrAssphage/WW/3E/SA/2022  | CrAssphage/WW/12U/SA/2022              | 0.01295079 |
| CrAssphage/WW/3E/SA/2022  | Phage/St/0597 88707/JPN/2022           | 0.01295079 |
| CrAssphage/WW/3E/SA/2022  | CrAssphage/WW/5U/SA/2022               | 0.01295203 |
| CrAssphage/WW/7E/SA/2022  | Phage/St/3938 15233/JPN/2023           | 0.01319690 |
| CrAssphage/WW/7E/SA/2022  | Phage/St/4255 5393/JPN/2023            | 0.01320424 |
| CrAssphage/WW/7E/SA/2022  | Phage/St/3206/JPN/2023                 | 0.01320424 |
| CrAssphage/WW/7E/SA/2022  | Phage/St/2775 102739/JPN/2022          | 0.01320424 |
| CrAssphage/WW/5U/SA/2022  | Phage/St/4004 62614/JPN/2023           | 0.01399986 |
| CrAssphage/WW/1E/SA/2022  | Phage/St/3519 63130/JPN/2023           | 0.01399986 |
| CrAssphage/WW/1E/SA/2022  | Phage/St/1602 50323/JPN/2022           | 0.01399986 |
| CrAssphage/WW/7E/SA/2022  | CrAssphage/WW/10E/SA/2022              | 0.01652888 |
| CrAssphage/WW/10E/SA/2022 | Phage/St/3729 82489/JPN/2022           | 0.01652888 |
| CrAssphage/WW/4E/SA/2022  | CrAssphage/WW/7E/SA/2022               | 0.01653119 |
| CrAssphage/WW/10E/SA/2022 | CrAssphage/WW/12E/SA/2022              | 0.01653119 |
| CrAssphage/WW/2M/SA/2022  | Phage/St/3552 133772/JPN/2023          | 0.01653354 |
| CrAssphage/WW/3E/SA/2022  | Phage/St/2938 98355/JPN/2023           | 0.01655682 |



|                           |                                        |            |
|---------------------------|----------------------------------------|------------|
| CrAssphage/WW/3E/SA/2022  | Phage/St/0634 44215/JPN/2022           | 0.01655682 |
| CrAssphage/WW/3E/SA/2022  | Phage/St/4174 71253/JPN/2022           | 0.01655682 |
| CrAssphage/WW/3E/SA/2022  | Phage/St/3478 90668/JPN/2022           | 0.01655682 |
| CrAssphage/WW/3E/SA/2022  | Phage/St/2423 107994/JPN/2022          | 0.01655682 |
| CrAssphage/WW/12E/SA/2022 | Phage/St/3552 133772/JPN/2023          | 0.01656179 |
| CrAssphage/WW/12U/SA/2022 | Phage/St/3938 15233/JPN/2023           | 0.01688776 |
| CrAssphage/WW/10E/SA/2022 | Phage/St/3519 63130/JPN/2023           | 0.01689184 |
| CrAssphage/WW/10E/SA/2022 | Phage/St/1602 50323/JPN/2022           | 0.01689184 |
| CrAssphage/WW/4E/SA/2022  | Phage/St/2073 87643/JPN/2023           | 0.01689184 |
| CrAssphage/WW/4E/SA/2022  | Phage/St/3980 139557/JPN/2022          | 0.01689184 |
| CrAssphage/WW/3E/SA/2022  | Phage/St/4255 5393/JPN/2023            | 0.01689597 |
| CrAssphage/WW/12U/SA/2022 | Phage/St/4255 5393/JPN/2023            | 0.01689597 |
| CrAssphage/WW/3E/SA/2022  | Phage/St/3206/JPN/2023                 | 0.01689597 |
| CrAssphage/WW/12U/SA/2022 | Phage/St/3206/JPN/2023                 | 0.01689597 |
| CrAssphage/WW/3E/SA/2022  | Phage/St/2775 102739/JPN/2022          | 0.01689597 |
| CrAssphage/WW/12U/SA/2022 | Phage/St/2775 102739/JPN/2022          | 0.01689597 |
| CrAssphage/WW/10E/SA/2022 | Phage/St/1876 43632/JPN/2022           | 0.01689597 |
| CrAssphage/WW/10E/SA/2022 | Phage/St/PF-P004 38259/JPN/2023        | 0.01689597 |
| CrAssphage/WW/1E/SA/2022  | Phage/St/2938 98355/JPN/2023           | 0.01690015 |
| CrAssphage/WW/1E/SA/2022  | Phage/St/0634 44215/JPN/2022           | 0.01690015 |
| CrAssphage/WW/1E/SA/2022  | Phage/St/0597 88707/JPN/2022           | 0.01690015 |
| CrAssphage/WW/1E/SA/2022  | Phage/St/4174 71253/JPN/2022           | 0.01690015 |
| CrAssphage/WW/1E/SA/2022  | Phage/St/3478 90668/JPN/2022           | 0.01690015 |
| CrAssphage/WW/1E/SA/2022  | Phage/St/2423 107994/JPN/2022          | 0.01690015 |
| CrAssphage/WW/4E/SA/2022  | Phage/St/PF-P004 38259/JPN/2023        | 0.01690015 |
| CrAssphage/WW/3E/SA/2022  | Phage/St/3253 10036/JPN/2023           | 0.01764462 |
| CrAssphage/WW/3E/SA/2022  | Phage/St/2797 3646/JPN/2022            | 0.01764462 |
| CrAssphage/WW/12E/SA/2022 | Phage/St/4004 62614/JPN/2023           | 0.01764462 |
| CrAssphage/WW/10E/SA/2022 | Phage/St/3552 133772/JPN/2023          | 0.01764462 |
| CrAssphage/WW/1E/SA/2022  | Phage/St/3938 15233/JPN/2023           | 0.01874413 |
| CrAssphage/WW/10E/SA/2022 | CrAssphage/WW/12U/SA/2022              | 0.02064712 |
| CrAssphage/WW/10E/SA/2022 | Phage/St/0597 88707/JPN/2022           | 0.02064712 |
| CrAssphage/WW/3E/SA/2022  | CrAssphage/WW/4E/SA/2022               | 0.02065013 |
| CrAssphage/WW/5U/SA/2022  | CrAssphage/WW/10E/SA/2022              | 0.02065013 |
| CrAssphage/WW/7E/SA/2022  | Phage/St/3552 133772/JPN/2023          | 0.02065317 |
| CrAssphage/WW/5U/SA/2022  | Phage/St/3552 133772/JPN/2023          | 0.02082245 |
| CrAssphage/WW/10E/SA/2022 | Phage/St/1900 63868/JPN/2022           | 0.02091510 |
| CrAssphage/WW/10E/SA/2022 | Phage/St/1043 114173/JPN/2022          | 0.02091991 |
| CrAssphage/WW/10E/SA/2022 | CrAssphage/HuG/YS1-2 2437/JPN/2020     | 0.02091991 |
| CrAssphage/WW/10E/SA/2022 | CrAssphage/HuG/FA1-2 000172F/JPN/2020  | 0.02091991 |
| CrAssphage/WW/10E/SA/2022 | CrAssphage/HuG/ES ALL 000190F/JPN/2020 | 0.02091991 |
| CrAssphage/WW/10E/SA/2022 | Phage/St/PF-P005 31277/JPN/2023        | 0.02091991 |
| CrAssphage/WW/10E/SA/2022 | Phage/St/0498 70082/JPN/2022           | 0.02091991 |
| CrAssphage/WW/10E/SA/2022 | Phage/St/3938 15233/JPN/2023           | 0.02157856 |
| CrAssphage/WW/4E/SA/2022  | Phage/St/3938 15233/JPN/2023           | 0.02158625 |
| CrAssphage/WW/2M/SA/2022  | Phage/St/4004 62614/JPN/2023           | 0.02159404 |
| CrAssphage/WW/12U/SA/2022 | Phage/St/4004 62614/JPN/2023           | 0.02159404 |
| CrAssphage/WW/4E/SA/2022  | Phage/St/3519 63130/JPN/2023           | 0.02159404 |

|                           |                               |            |
|---------------------------|-------------------------------|------------|
| CrAssphage/WW/4E/SA/2022  | Phage/St/1602 50323/JPN/2022  | 0.02159404 |
| CrAssphage/WW/1E/SA/2022  | CrAssphage/WW/10E/SA/2022     | 0.02160194 |
| CrAssphage/WW/1E/SA/2022  | Phage/St/4004 62614/JPN/2023  | 0.02160993 |
| CrAssphage/WW/12U/SA/2022 | Phage/St/3552 133772/JPN/2023 | 0.02515661 |
| CrAssphage/WW/10E/SA/2022 | Phage/St/2938 98355/JPN/2023  | 0.02529028 |
| CrAssphage/WW/10E/SA/2022 | Phage/St/0634 44215/JPN/2022  | 0.02529028 |
| CrAssphage/WW/10E/SA/2022 | Phage/St/4174 71253/JPN/2022  | 0.02529028 |
| CrAssphage/WW/10E/SA/2022 | Phage/St/3478 90668/JPN/2022  | 0.02529028 |
| CrAssphage/WW/10E/SA/2022 | Phage/St/2423 107994/JPN/2022 | 0.02529028 |
| CrAssphage/WW/12E/SA/2022 | Phage/St/3253 10036/JPN/2023  | 0.02530726 |
| CrAssphage/WW/12E/SA/2022 | Phage/St/2797 3646/JPN/2022   | 0.02530726 |
| CrAssphage/WW/7E/SA/2022  | Phage/St/4004 62614/JPN/2023  | 0.02589473 |
| CrAssphage/WW/2M/SA/2022  | Phage/St/3253 10036/JPN/2023  | 0.02590348 |
| CrAssphage/WW/2M/SA/2022  | Phage/St/2797 3646/JPN/2022   | 0.02590348 |
| CrAssphage/WW/1E/SA/2022  | Phage/St/3552 133772/JPN/2023 | 0.02592134 |
| CrAssphage/WW/10E/SA/2022 | Phage/St/4255 5393/JPN/2023   | 0.02693279 |
| CrAssphage/WW/10E/SA/2022 | Phage/St/3206/JPN/2023        | 0.02693279 |
| CrAssphage/WW/10E/SA/2022 | Phage/St/2775 102739/JPN/2022 | 0.02693279 |
| CrAssphage/WW/5U/SA/2022  | Phage/St/3253 10036/JPN/2023  | 0.03009026 |
| CrAssphage/WW/5U/SA/2022  | Phage/St/2797 3646/JPN/2022   | 0.03009026 |
| CrAssphage/WW/4E/SA/2022  | Phage/St/3552 133772/JPN/2023 | 0.03009026 |
| CrAssphage/WW/4E/SA/2022  | CrAssphage/WW/10E/SA/2022     | 0.03057479 |
| CrAssphage/WW/3E/SA/2022  | Phage/St/4004 62614/JPN/2023  | 0.03057479 |
| CrAssphage/WW/7E/SA/2022  | Phage/St/3253 10036/JPN/2023  | 0.03058465 |
| CrAssphage/WW/7E/SA/2022  | Phage/St/2797 3646/JPN/2022   | 0.03058465 |
| CrAssphage/WW/12U/SA/2022 | Phage/St/3253 10036/JPN/2023  | 0.03568498 |
| CrAssphage/WW/12U/SA/2022 | Phage/St/2797 3646/JPN/2022   | 0.03568498 |
| CrAssphage/WW/1E/SA/2022  | Phage/St/3253 10036/JPN/2023  | 0.03806436 |
| CrAssphage/WW/1E/SA/2022  | Phage/St/2797 3646/JPN/2022   | 0.03806436 |
| CrAssphage/WW/4E/SA/2022  | Phage/St/3253 10036/JPN/2023  | 0.04207676 |
| CrAssphage/WW/4E/SA/2022  | Phage/St/2797 3646/JPN/2022   | 0.04207676 |
| CrAssphage/WW/10E/SA/2022 | Phage/St/4004 62614/JPN/2023  | 0.04340990 |

**Table S4. Best fitting nucleotide substitution model for MP-PBD gene**

| Model    | #Param | BIC         | AICc        | lnL          | Invariant   | Gamma | R          | Freq A   | Freq T   | Freq C    | Freq G    |
|----------|--------|-------------|-------------|--------------|-------------|-------|------------|----------|----------|-----------|-----------|
| T92+G+I  | 49     | 1334.201277 | 1012.468065 | -456.7717684 | 0.838338615 | 0.44  | 0.65195311 | 0.354112 | 0.354112 | 0.1458879 | 0.1458879 |
| T92+G    | 48     | 1340.711908 | 1025.526399 | -464.3195097 | n/a         | 0.05  | 0.55932358 | 0.354112 | 0.354112 | 0.1458879 | 0.1458879 |
| HKY+G+I  | 51     | 1351.241897 | 1016.415586 | -456.7072265 | 0.836512893 | 0.43  | 0.65856137 | 0.343178 | 0.365047 | 0.1295327 | 0.162243  |
| HKY+G    | 50     | 1357.762613 | 1029.482467 | -464.2600106 | n/a         | 0.05  | 0.55979417 | 0.343178 | 0.365047 | 0.1295327 | 0.162243  |
| TN93+G+I | 52     | 1358.507589 | 1017.135883 | -456.0476469 | 0.846870616 | 0.47  | 0.67140602 | 0.343178 | 0.365047 | 0.1295327 | 0.162243  |
| TN93+G   | 51     | 1365.476248 | 1030.649937 | -463.8244023 | n/a         | 0.05  | 0.56796827 | 0.343178 | 0.365047 | 0.1295327 | 0.162243  |
| JC+G+I   | 47     | 1367.33528  | 1058.698243 | -481.9236218 | 0.596064703 | 0.06  | 0.5        | 0.25     | 0.25     | 0.25      | 0.25      |
| T92+I    | 48     | 1368.758165 | 1053.572657 | -478.3426386 | 0.466367713 | n/a   | 0.53397504 | 0.354112 | 0.354112 | 0.1458879 | 0.1458879 |
| JC+G     | 46     | 1371.161423 | 1069.073626 | -488.1291191 | n/a         | 0.05  | 0.5        | 0.25     | 0.25     | 0.25      | 0.25      |
| T92      | 47     | 1376.730404 | 1068.093368 | -486.621184  | n/a         | n/a   | 0.5270582  | 0.354112 | 0.354112 | 0.1458879 | 0.1458879 |
| K2+G+I   | 48     | 1382.328404 | 1067.142895 | -485.1277578 | 0.590476081 | 0.06  | 1.34255137 | 0.25     | 0.25     | 0.25      | 0.25      |
| GTR+G+I  | 55     | 1382.397889 | 1021.394619 | -455.1155187 | 0.834437329 | 0.43  | 0.56783784 | 0.343178 | 0.365047 | 0.1295327 | 0.162243  |
| K2+G     | 47     | 1384.559304 | 1075.922267 | -490.5356336 | n/a         | 0.05  | 1.25486816 | 0.25     | 0.25     | 0.25      | 0.25      |
| HKY+I    | 50     | 1385.809029 | 1057.528883 | -478.2832186 | 0.466367713 | n/a   | 0.53416307 | 0.343178 | 0.365047 | 0.1295327 | 0.162243  |
| GTR+G    | 54     | 1386.818782 | 1032.358596 | -461.6183915 | n/a         | 0.05  | 0.53912503 | 0.343178 | 0.365047 | 0.1295327 | 0.162243  |
| TN93+I   | 51     | 1393.578303 | 1058.751992 | -477.8754295 | 0.466367713 | n/a   | 0.53578368 | 0.343178 | 0.365047 | 0.1295327 | 0.162243  |
| HKY      | 49     | 1393.782023 | 1072.048811 | -486.5621413 | n/a         | n/a   | 0.5271575  | 0.343178 | 0.365047 | 0.1295327 | 0.162243  |
| JC+I     | 46     | 1398.569451 | 1096.481654 | -501.8331331 | 0.466367713 | n/a   | 0.5        | 0.25     | 0.25     | 0.25      | 0.25      |
| TN93     | 50     | 1401.588101 | 1073.307954 | -486.1727543 | n/a         | n/a   | 0.5266347  | 0.343178 | 0.365047 | 0.1295327 | 0.162243  |
| JC       | 45     | 1406.583249 | 1111.045459 | -510.1324581 | n/a         | n/a   | 0.5        | 0.25     | 0.25     | 0.25      | 0.25      |
| K2+I     | 47     | 1411.251736 | 1102.614699 | -503.8818496 | 0.466367713 | n/a   | 1.17778635 | 0.25     | 0.25     | 0.25      | 0.25      |
| GTR+I    | 54     | 1416.218917 | 1061.75873  | -476.3184586 | 0.466367713 | n/a   | 0.46692076 | 0.343178 | 0.365047 | 0.1295327 | 0.162243  |
| K2       | 46     | 1419.532483 | 1117.444686 | -512.3146494 | n/a         | n/a   | 1.17036486 | 0.25     | 0.25     | 0.25      | 0.25      |
| GTR      | 53     | 1424.105896 | 1076.189565 | -484.5543745 | n/a         | n/a   | 0.464803   | 0.343178 | 0.365047 | 0.1295327 | 0.162243  |

Models with the lowest BIC scores (Bayesian Information Criterion) are considered to describe the substitution pattern the best. For each model, AICc value (Akaike Information Criterion, corrected), Maximum Likelihood value (lnL), and the number of parameters (including branch lengths) are also presented. Non-uniformity of evolutionary rates among sites may be modeled by using a discrete Gamma distribution (+G) with 5 rate categories and by assuming that a certain fraction of sites is evolutionarily invariable (+I). Whenever applicable, estimates of gamma shape parameter and/or the estimated fraction of invariant sites are shown. (Kumar *et al.*, 2018)

\*Abbreviations: TR: General Time Reversible; HKY: Hasegawa-Kishino-Yano; TN93: Tamura-Nei; T92: Tamura 3-parameter; K2: Kimura 2-parameter; JC: Jukes-Cantor



**Table S5. Sequences used for phylogenetic analysis of CrAssphage MP-PBD gene.**

| <b>Accession number</b> | <b>Sequence nomination</b>                                 | <b>Abbreviated name used for phylogenetic tree</b> | <b>Country</b> | <b>Source</b> |
|-------------------------|------------------------------------------------------------|----------------------------------------------------|----------------|---------------|
| <b>OP075001.1</b>       | MAG: Bacteriophage sp. Isolate 2900_14151, partial genome  | Phage/St/2900_14151/JPN/2023                       | Japan          | Stool         |
| <b>OP072767.1</b>       | MAG: Bacteriophage sp. isolate 3798_1224, partial genome   | Phage/St/3798_1224/JPN/2022                        | Japan          | Stool         |
| <b>OP075729.1</b>       | MAG: Bacteriophage sp. isolate 3695_32156, complete genome | Phage/St/3695_32156/JPN/2023                       | Japan          | Stool         |
| <b>OP074980.1</b>       | MAG: Bacteriophage sp. isolate 2879_32956, partial genome  | Phage/St/2879_32956/JPN/2023                       | Japan          | Stool         |
| <b>OP072609.1</b>       | MAG: Bacteriophage sp. isolate 3389_74325, partial genome  | Phage/St/3389_74325/JPN/2022                       | Japan          | Stool         |
| <b>OP072511.1</b>       | MAG: Bacteriophage sp. isolate 3067_17778, partial genome  | Phage/St/3067_17778/JPN/2022                       | Japan          | Stool         |
| <b>OP075953.1</b>       | MAG: Bacteriophage sp. isolate 3955_36540, partial genome  | Phage/St/3955_36540/JPN/2023                       | Japan          | Stool         |
| <b>OP075799.1</b>       | MAG: Bacteriophage sp. isolate 3786_84692, partial genome  | Phage/St/3786_84692/JPN/2023                       | Japan          | Stool         |
| <b>OP075580.1</b>       | MAG: Bacteriophage sp. isolate 3522_63963, partial genome  | Phage/St/3522_63963/JPN/2023                       | Japan          | Stool         |
| <b>OP075087.1</b>       | MAG: Bacteriophage sp. Isolate 2980_37109, partial genome  | Phage/St/2980_37109/JPN/2023                       | Japan          | Stool         |
| <b>OP030946.1</b>       | MAG: Bacteriophage sp. isolate 1405_61638, partial genome  | Phage/St/1405_61638/JPN/2022                       | Japan          | Stool         |
| <b>OP075443.1</b>       | MAG: Bacteriophage sp. isolate 3388_29408, partial genome  | Phage/St/3388_29408/JPN/2023                       | Japan          | Stool         |
| <b>OP074980.1</b>       | MAG: Bacteriophage sp. isolate 2879_32956, partial genome  | Phage/St/2879_32956/JPN/2023                       | Japan          | Stool         |

|                    |                                                             |                                            |       |           |
|--------------------|-------------------------------------------------------------|--------------------------------------------|-------|-----------|
| <b>OP074775.1</b>  | MAG: Bacteriophage sp. isolate 2650_35736, complete genome  | Phage/St/2650_35736/JPN/2022               | Japan | Stool     |
| <b>OP073572.1</b>  | MAG: Bacteriophage sp. isolate 0937_15216, partial genome   | Phage/St/0937_15216/JPN/2022               | Japan | Stool     |
| <b>OP072840.1</b>  | MAG: Bacteriophage sp. isolate 4078_53722, partial genome   | Phage/St/4078_53722/JPN/2022               | Japan | Stool     |
| <b>OP072890.1</b>  | MAG: Bacteriophage sp. isolate 4268_83826, complete genome  | Phage/St/4268_83826/JPN/2022               | Japan | Stool     |
| <b>OP072218.1</b>  | MAG: Bacteriophage sp. isolate 2121_105414, partial genome  | Phage/St/2121_105414/JPN/2022              | Japan | Stool     |
| <b>OP031107.1</b>  | MAG: Bacteriophage sp. isolate 2023_91933, partial genome   | Phage/St/2023_91933/JPN/2022               | Japan | Stool     |
| <b>OP030832.1</b>  | MAG: Bacteriophage sp. isolate 0810_75712, partial genome   | Phage/St/0810_75712/JPN/2022               | Japan | Stool     |
| <b>OP076428.1</b>  | MAG: Bacteriophage sp. isolate 2025_86962, partial genome   | Phage/St/2025_86962/JPN/2023               | Japan | Stool     |
| <b>OP073190.1</b>  | MAG: Bacteriophage sp. isolate 0377_101794, complete genome | Phage/St/0377_101794/JPN/2022              | Japan | Stool     |
| <b>OP030869.1</b>  | MAG: Bacteriophage sp. isolate 1009_62914, complete genome  | Phage/St/1009_62914/JPN/2022               | Japan | Stool     |
| <b>MK415410.1</b>  | MAG: CrAssphage YS1-2_2437, complete genome                 | CrAssphage/HuG/YS1-2_2437/JPN/2020         | Japan | human gut |
| <b>NC_067194.1</b> | MAG: Carjivirus communis, complete genome                   | CrAssphage/St/Carjivirus communis/USA/2023 | USA   | Stool     |
| <b>OP075978.1</b>  | MAG: Bacteriophage sp. isolate 3989_33300, partial genome   | Phage/St/3989_33300/JPN/2023               | Japan | Stool     |
| <b>OP075780.1</b>  | MAG: Bacteriophage sp. isolate 3764_67264, partial genome   | Phage/St/3764_67264/JPN/2023               | Japan | Stool     |
| <b>OP075946.1</b>  | MAG: Bacteriophage sp. isolate 3947_59002, complete genome  | Phage/St/3947_59002/JPN/2023               | Japan | Stool     |
| <b>OP075632.1</b>  | MAG: Bacteriophage sp. isolate 3575_41778, partial genome   | Phage/St/3575_41778/JPN/2023               | Japan | Stool     |
| <b>OP075506.1</b>  | MAG: Bacteriophage sp. isolate 3451_51812, partial genome   | Phage/St/3451_51812/JPN/2023               | Japan | Stool     |

|                   |                                                                |                                   |       |       |
|-------------------|----------------------------------------------------------------|-----------------------------------|-------|-------|
| <b>OP075975.1</b> | MAG: Bacteriophage sp. isolate 3986_25839, partial genome      | Phage/St/3986_25839/JPN/2023      | Japan | Stool |
| <b>OP075948.1</b> | MAG: Bacteriophage sp. isolate 3950_21566, complete genome     | Phage/St/3950_21566/JPN/2023      | Japan | Stool |
| <b>OP075612.1</b> | MAG: Bacteriophage sp. isolate 3556_60220, complete genome     | Phage/St/3556_60220/JPN/2023      | Japan | Stool |
| <b>OP075036.1</b> | MAG: Bacteriophage sp. isolate 2929_39558, partial genome      | Phage/St/2929_39558/JPN/2023      | Japan | Stool |
| <b>OP074964.1</b> | MAG: Bacteriophage sp. isolate 2861_38114, partial genome      | Phage/St/2861_38114/JPN/2023      | Japan | Stool |
| <b>OP075180.1</b> | MAG: Human gut phage 3075_79973 isolate 3075, complete genome  | Phage/St/3075/JPN/2023            | Japan | Stool |
| <b>OP076487.1</b> | MAG: Bacteriophage sp. isolate 2087_16664, partial genome      | Phage/St/2087_16664/JPN/2023      | Japan | Stool |
| <b>OP076277.1</b> | MAG: Bacteriophage sp. isolate PF-P005_31277, partial genome   | Phage/St/PF-P005_31277/JPN/2023   | Japan | Stool |
| <b>OP072921.1</b> | MAG: Bacteriophage sp. isolate PF-HC115_125715, partial genome | Phage/St/PF-HC115_125715/JPN/2022 | Japan | Stool |
| <b>OP072588.1</b> | MAG: Bacteriophage sp. isolate 3316_61037, partial genome      | Phage/St/3316_61037/JPN/2022      | Japan | Stool |

**Table S6.** Estimates of Evolutionary Divergence between Sequences of the MP-PBD protein.  
The red borders refer to the closest distance with current studied sequences.

| Species 1                         | Species 2                                 | Dist              |
|-----------------------------------|-------------------------------------------|-------------------|
| <b>CrAssphage/WW/88U/SA/2022</b>  | <b>Phage/St/3388 29408/JPN/2023</b>       | <b>0.01002303</b> |
| <b>CrAssphage/WW/88U/SA/2022</b>  | <b>Phage/St/0937 15216/JPN/2022</b>       | <b>0.01002303</b> |
| <b>CrAssphage/WW/88U/SA/2022</b>  | <b>Phage/St/2121 105414/JPN/2022</b>      | <b>0.01002303</b> |
| CrAssphage/WW/111E/SA/2022        | Phage/St/0377 101794/JPN/2022             | 0.01003723        |
| <b>CrAssphage/WW/88U/SA/2022</b>  | <b>Phage/St/4268 83826/JPN/2022</b>       | <b>0.01008693</b> |
| <b>CrAssphage/WW/88U/SA/2022</b>  | <b>Phage/St/2879 32956/JPN/2023</b>       | <b>0.01008693</b> |
| <b>CrAssphage/WW/77U/SA/2022</b>  | <b>CrAssphage/WW/112E/SA/2022</b>         | <b>0.01071937</b> |
| <b>CrAssphage/WW/111E/SA/2022</b> | <b>CrAssphage/HuG/YS1-2 2437/JPN/2020</b> | <b>0.01564090</b> |
| <b>CrAssphage/WW/111E/SA/2022</b> | <b>Phage/St/3947 59002/JPN/2023</b>       | <b>0.01564090</b> |
| <b>CrAssphage/WW/111E/SA/2022</b> | <b>Phage/St/3451 51812/JPN/2023</b>       | <b>0.01564090</b> |
| <b>CrAssphage/WW/111E/SA/2022</b> | <b>Phage/St/3388 29408/JPN/2023</b>       | <b>0.01564090</b> |
| <b>CrAssphage/WW/111E/SA/2022</b> | <b>Phage/St/0937 15216/JPN/2022</b>       | <b>0.01564090</b> |
| <b>CrAssphage/WW/111E/SA/2022</b> | <b>Phage/St/2121 105414/JPN/2022</b>      | <b>0.01564090</b> |
| CrAssphage/WW/111E/SA/2022        | Phage/St/3575 41778/JPN/2023              | 0.01564452        |
| CrAssphage/WW/77U/SA/2022         | Phage/St/2900 14151/JPN/2023              | 0.01572026        |
| CrAssphage/WW/88U/SA/2022         | Phage/St/2900 14151/JPN/2023              | 0.01572390        |
| CrAssphage/WW/111E/SA/2022        | Phage/St/4268 83826/JPN/2022              | 0.01596326        |
| CrAssphage/WW/111E/SA/2022        | Phage/St/2879 32956/JPN/2023              | 0.01596326        |
| CrAssphage/WW/88U/SA/2022         | CrAssphage/WW/111E/SA/2022                | 0.01605626        |
| CrAssphage/WW/88U/SA/2022         | Phage/St/0377 101794/JPN/2022             | 0.01605969        |
| <b>CrAssphage/WW/112E/SA/2022</b> | <b>Phage/St/3986 25839/JPN/2023</b>       | <b>0.02196325</b> |
| <b>CrAssphage/WW/112E/SA/2022</b> | <b>Phage/St/3950 21566/JPN/2023</b>       | <b>0.02196325</b> |
| <b>CrAssphage/WW/112E/SA/2022</b> | <b>Phage/St/2929 39558/JPN/2023</b>       | <b>0.02196325</b> |
| <b>CrAssphage/WW/112E/SA/2022</b> | <b>Phage/St/2861 38114/JPN/2023</b>       | <b>0.02196325</b> |
| <b>CrAssphage/WW/112E/SA/2022</b> | <b>Phage/St/3075/JPN/2023</b>             | <b>0.02196325</b> |
| <b>CrAssphage/WW/112E/SA/2022</b> | <b>Phage/St/2087 16664/JPN/2023</b>       | <b>0.02196325</b> |
| <b>CrAssphage/WW/112E/SA/2022</b> | <b>Phage/St/PF-P005 31277/JPN/2023</b>    | <b>0.02196325</b> |
| <b>CrAssphage/WW/112E/SA/2022</b> | <b>Phage/St/3316 61037/JPN/2022</b>       | <b>0.02196325</b> |
| CrAssphage/WW/88U/SA/2022         | Phage/St/3575 41778/JPN/2023              | 0.02210874        |
| CrAssphage/WW/77U/SA/2022         | Phage/St/2879 32956/JPN/2023              | 0.02241539        |
| CrAssphage/WW/77U/SA/2022         | CrAssphage/WW/88U/SA/2022                 | 0.02242730        |
| CrAssphage/WW/112E/SA/2022        | Phage/St/3955 36540/JPN/2023 {outgroup}   | 0.02910606        |
| CrAssphage/WW/77U/SA/2022         | CrAssphage/WW/111E/SA/2022                | 0.02929428        |
| CrAssphage/WW/88U/SA/2022         | CrAssphage/HuG/YS1-2 2437/JPN/2020        | 0.02929428        |
| CrAssphage/WW/88U/SA/2022         | Phage/St/3947 59002/JPN/2023              | 0.02929428        |
| CrAssphage/WW/88U/SA/2022         | Phage/St/3451 51812/JPN/2023              | 0.02929428        |
| CrAssphage/WW/77U/SA/2022         | Phage/St/3955 36540/JPN/2023 {outgroup}   | 0.02929428        |
| CrAssphage/WW/112E/SA/2022        | Phage/St/2900 14151/JPN/2023              | 0.03012728        |
| CrAssphage/WW/88U/SA/2022         | Phage/St/3955 36540/JPN/2023 {outgroup}   | 0.03258890        |
| CrAssphage/WW/77U/SA/2022         | Phage/St/4268 83826/JPN/2022              | 0.03694566        |
| CrAssphage/WW/111E/SA/2022        | Phage/St/2900 14151/JPN/2023              | 0.03699854        |

|                            |                                         |            |
|----------------------------|-----------------------------------------|------------|
| CrAssphage/WW/77U/SA/2022  | Phage/St/3986 25839/JPN/2023            | 0.03779555 |
| CrAssphage/WW/77U/SA/2022  | Phage/St/3950 21566/JPN/2023            | 0.03779555 |
| CrAssphage/WW/77U/SA/2022  | Phage/St/2929 39558/JPN/2023            | 0.03779555 |
| CrAssphage/WW/77U/SA/2022  | Phage/St/2861 38114/JPN/2023            | 0.03779555 |
| CrAssphage/WW/77U/SA/2022  | Phage/St/3075/JPN/2023                  | 0.03779555 |
| CrAssphage/WW/77U/SA/2022  | Phage/St/2087 16664/JPN/2023            | 0.03779555 |
| CrAssphage/WW/77U/SA/2022  | Phage/St/PF-P005 31277/JPN/2023         | 0.03779555 |
| CrAssphage/WW/77U/SA/2022  | Phage/St/3316 61037/JPN/2022            | 0.03779555 |
| CrAssphage/WW/77U/SA/2022  | Phage/St/3388 29408/JPN/2023            | 0.03782728 |
| CrAssphage/WW/77U/SA/2022  | Phage/St/0937 15216/JPN/2022            | 0.03782728 |
| CrAssphage/WW/77U/SA/2022  | Phage/St/2121 105414/JPN/2022           | 0.03782728 |
| CrAssphage/WW/112E/SA/2022 | Phage/St/2879 32956/JPN/2023            | 0.03952147 |
| CrAssphage/WW/111E/SA/2022 | Phage/St/3955 36540/JPN/2023 {outgroup} | 0.03962923 |
| CrAssphage/WW/88U/SA/2022  | CrAssphage/WW/112E/SA/2022              | 0.03990813 |
| CrAssphage/WW/77U/SA/2022  | Phage/St/0377 101794/JPN/2022           | 0.04557413 |
| CrAssphage/WW/111E/SA/2022 | CrAssphage/WW/112E/SA/2022              | 0.04767971 |
| CrAssphage/WW/77U/SA/2022  | CrAssphage/HuG/YS1-2 2437/JPN/2020      | 0.04801986 |
| CrAssphage/WW/77U/SA/2022  | Phage/St/3947 59002/JPN/2023            | 0.04801986 |
| CrAssphage/WW/77U/SA/2022  | Phage/St/3451 51812/JPN/2023            | 0.04801986 |
| CrAssphage/WW/111E/SA/2022 | Phage/St/3986 25839/JPN/2023            | 0.05068257 |
| CrAssphage/WW/111E/SA/2022 | Phage/St/3950 21566/JPN/2023            | 0.05068257 |
| CrAssphage/WW/111E/SA/2022 | Phage/St/2929 39558/JPN/2023            | 0.05068257 |
| CrAssphage/WW/111E/SA/2022 | Phage/St/2861 38114/JPN/2023            | 0.05068257 |
| CrAssphage/WW/111E/SA/2022 | Phage/St/2087 16664/JPN/2023            | 0.05068257 |
| CrAssphage/WW/111E/SA/2022 | Phage/St/PF-P005 31277/JPN/2023         | 0.05068257 |
| CrAssphage/WW/111E/SA/2022 | Phage/St/3316 61037/JPN/2022            | 0.05068257 |
| CrAssphage/WW/112E/SA/2022 | Phage/St/0377 101794/JPN/2022           | 0.05506142 |
| CrAssphage/WW/77U/SA/2022  | Phage/St/3575 41778/JPN/2023            | 0.05544475 |
| CrAssphage/WW/112E/SA/2022 | Phage/St/4268 83826/JPN/2022            | 0.05661275 |
| CrAssphage/WW/112E/SA/2022 | CrAssphage/HuG/YS1-2 2437/JPN/2020      | 0.05962600 |
| CrAssphage/WW/112E/SA/2022 | Phage/St/3947 59002/JPN/2023            | 0.05962600 |
| CrAssphage/WW/112E/SA/2022 | Phage/St/3451 51812/JPN/2023            | 0.05962600 |
| CrAssphage/WW/112E/SA/2022 | Phage/St/3388 29408/JPN/2023            | 0.05962600 |
| CrAssphage/WW/112E/SA/2022 | Phage/St/0937 15216/JPN/2022            | 0.05962600 |
| CrAssphage/WW/112E/SA/2022 | Phage/St/2121 105414/JPN/2022           | 0.05962600 |
| CrAssphage/WW/88U/SA/2022  | Phage/St/3075/JPN/2023                  | 0.06019881 |
| CrAssphage/WW/112E/SA/2022 | Phage/St/3575 41778/JPN/2023            | 0.06669287 |
| CrAssphage/WW/111E/SA/2022 | Phage/St/3075/JPN/2023                  | 0.06953129 |
| CrAssphage/WW/88U/SA/2022  | Phage/St/3986 25839/JPN/2023            | 0.08131183 |
| CrAssphage/WW/88U/SA/2022  | Phage/St/3950 21566/JPN/2023            | 0.08131183 |
| CrAssphage/WW/88U/SA/2022  | Phage/St/2929 39558/JPN/2023            | 0.08131183 |
| CrAssphage/WW/88U/SA/2022  | Phage/St/2861 38114/JPN/2023            | 0.08131183 |
| CrAssphage/WW/88U/SA/2022  | Phage/St/2087 16664/JPN/2023            | 0.08131183 |
| CrAssphage/WW/88U/SA/2022  | Phage/St/PF-P005 31277/JPN/2023         | 0.08131183 |
| CrAssphage/WW/88U/SA/2022  | Phage/St/3316 61037/JPN/2022            | 0.08131183 |
